1 **Ethanolamine improves colonic barrier functions and inflammatory immunoreactions via**  
2 **shifting microbiome dysbiosis**

3 Jian Zhou<sup>1,3</sup>, Xia Xiong<sup>1#</sup>, Dan Wan<sup>1</sup>, Hongnan Liu<sup>1</sup>, Yirui Shao<sup>1,3</sup>, Yuliang Wu<sup>1</sup>, Xiali Huang<sup>1</sup>,  
4 Chanfeng Peng<sup>1</sup>, Pan Huang<sup>1</sup>, Lijun Zou<sup>1,4</sup>, Yulong Yin<sup>1,2,3,4</sup>

5 *1. National Engineering Laboratory for Pollution Control and Waste Utilization in Livestock and*  
6 *Poultry Production; Key Laboratory of Agro-Ecological Processes in Subtropical Region, Institute*  
7 *of Subtropical Agriculture, Chinese Academy of Sciences; Hunan Provincial Engineering*  
8 *Research Center for Healthy Livestock and Poultry Production; Scientific Observing and*  
9 *Experimental Station of Animal Nutrition and Feed Science in South-Central, Ministry of*  
10 *Agriculture, Changsha, Hunan 410125, China;*

11 *2. Hunan International Joint Laboratory of Animal Intestinal Ecology and Health, Laboratory of*  
12 *Animal Nutrition and Human Health, College of Life Sciences, Hunan Normal University,*  
13 *Changsha, Hunan, 410081, China;*

14 *3. University of Chinese Academy of Sciences, Beijing, China.*

15 *4. Laboratory of Basic Biology, Hunan First Normal University, Changsha 410205, China.*

16 *# Address correspondence to Xiong Xia, xx@isa.ac.cn & Yin Yulong, yinyulong@isa.ac.cn*

17 **Abstract**

18 Ethanolamine(EA) often occurs at a relatively high concentration within the inflamed gut of IBD  
19 patients. To investigate the role of EA in colonic inflammation and host-microbiome dysbiosis,  
20 thirty-six ICR mice were treated with 3% DSS for a week to generate acute intestinal  
21 inflammation and then supplied with 0μM, 500μM (LowEA), and 3000 μM (HighEA) in drinking  
22 water for two weeks, after that, 16s RNA sequencing was applied in characterizing the changes in  
23 colonic microbiota driven by different EA levels. An inflamed colonic organoid model via 3%  
24 DSS treatment was also established for further verification of these in vivo findings. EA  
25 significantly reduced proximal colonic crypt depth but increased distal colonic villus height in  
26 HighEA group. The protein and mRNA expression of occludin and Reg3β, BD1, BD2, and  
27 MUC2 were significantly up-regulated in EA treated groups. EA decreased mucosal  
28 inflammation-related cytokines levels (IL1, IL6, IL17, TNFα, and INFγ) and increased the  
29 significantly increased concentration of sIgA. Serum aspartate aminotransferase and alanine  
30 aminotransferase were significantly down-regulated in the highEA group. EA increased the  
31 relative abundance of *Blautia*, *Roseburia*, *Lactobacillus*, *Faecalibaculum*,  
32 *Candidatus\_Saccharimonas*, *Alloprevotella*, and *Lachnoclostridium*. and thus microbial metabolic  
33 pathways including *Oxidative phosphorylation*, *Lipopolysaccharide biosynthesis*, *Arginine and*  
34 *proline metabolism*, *Folate biosynthesis*, and *Biotin metabolism* were more abundant in LowEA  
35 group than those in control. EA up-regulated the protein or mRNA expression of TLR4/MyD88 in  
36 colonic tissues and the DSS-treated colonic organoid model. This study firstly demonstrated that  
37 ethanolamine in altering host-microbiome dysbiosis, which may provide new insights into the role  
38 of dietary lipids in IBD.

39 **Keywords:** CDP-ethanolamine, Inflammatory bowel diseases, Gut microbiota, host-microbial  
40 interactions

41 **Importance**

42 Inflammatory bowel disease (IBD) affects ~3.1 million people in the USA and is increasing in  
43 incidence worldwide. IBD pathogenesis has been associated with gut microbiome dysbiosis  
44 characterized as a decrease in gut microbial diversity. Extensive works have demonstrated the

45 roles of dietary fiber, short-chain fatty acids, and aromatic amino acids in altering the composition  
46 of gut microbiota to restore immune homeostasis and alleviate inflammation via diverse  
47 mechanisms in IBD. However, little is known about essential sphingolipids like ethanolamine  
48 (EA), an essential compound in the CDP-ethanolamine pathway for phosphatidylethanolamine  
49 (PE) in both intestinal cells and bacteria. PE synthesis deficiency can ultimately result in a loss of  
50 membrane integrity and metabolic disorders in IBD. Our results demonstrate that ethanolamine  
51 could improve colonic barrier functions and inflammatory immunoreactions via shifting  
52 microbiome dysbiosis, which provides new insights into the role of dietary lipids in IBD.

53

## 54 **1. Introduction**

55 Nutrient signals, microbiome dysbiosis, and host immunoreactions have a pivotal role in the  
56 development of inflammatory bowel diseases (IBD) and colorectal cancer<sup>1-4</sup>. The gastrointestinal  
57 tract not only acts as the primary site of food digestion and nutrition absorption but also provides  
58 an essential interface for the interactions of gut microbiota and immune systems<sup>5</sup>. Dramatic  
59 alterations in the composition of gut microbiota and intestinal barrier dysfunction have been found  
60 in IBD Patients<sup>3,6</sup>. Nutrient signals including gut microbial-derived metabolites, aromatic amino  
61 acids, short-chain fatty acids and activate compounds can directly impact the establishment of the  
62 tumor-associated microenvironment and contribute to host-microbial interactions in the progress  
63 of the colorectal cancer<sup>3-4</sup>. Extensive works have demonstrated the roles of L-arginine<sup>7</sup> and  
64 tryptophan<sup>8</sup>, and short-chain fatty acids like butyrate<sup>9</sup> and acetate<sup>10</sup> in altering host-microbial  
65 interactions to restore gut homeostasis and alleviate intestinal inflammation through diverse  
66 mechanisms<sup>3</sup>. However, little is known about essential sphingolipids like ethanolamine (EA), an  
67 essential compound in the CDP-ethanolamine pathway for phosphatidylethanolamine (PE)  
68 synthesis<sup>11</sup>. PE synthesis deficiency can ultimately result in a loss of membrane integrity and  
69 metabolic disorders in inflammatory diseases<sup>10,12</sup>. The gastrointestinal tract keeps a physiological  
70 concentration of EA at 1~2mM via daily diet intake and internal recycling of PE to maintain  
71 intestinal metabolic homeostasis<sup>13</sup>.

72 IBD patients consistently suffered from chronic inflammation and held more opportunities to  
73 develop cancer<sup>14</sup>. Lipid-mediated host-microbial interactions in metabolism and immune reactions  
74 are implicated in chronic inflammatory diseases like IBD<sup>15</sup>. Ethanolamine has been detected at a  
75 relatively high concentration within the inflamed gut of both IBD patients and rodent models as  
76 the hydrolysate of PE<sup>16-17</sup>. Ethanolamine can be utilized by both intestinal epithelial cells<sup>11</sup> and  
77 bacteria like *Enterococcus faecalis*<sup>18</sup> that hold the EA utilization (*eut*) genes via the CDP-EA  
78 pathway<sup>10</sup>, which confers it with the potential role in mediating the cross-talk between the  
79 intestinal epithelium and gut microbiota. A recent study highlighted that EA could promote the  
80 mesenchymal-to-epithelial transitions via a CDP-EA-Pebp1 dependent manner that ultimately  
81 leads to NF- $\kappa$ B inhibition<sup>11</sup>. Ethanolamine has been associated with the pathogenesis of *eut*  
82 pathogens such as *Salmonella*<sup>16</sup> and enterohemorrhagic *Escherichia coli* (EHEC)<sup>17</sup> that have been  
83 reported to promote colorectal carcinogenesis and tumor formation<sup>2-3</sup>. For instance, several studies  
84 have demonstrated that *S. Typhimurium* can sidestep nutritional competition with commensal  
85 bacteria by utilizing EA in inflamed gut<sup>16, 19-20</sup>. Toll-like receptors (TLRs) have a vital role in  
86 mucosal immune responses to gut bacteria, and the TLR4 expression was always dramatically  
87 up-regulated in the intestines of IBD patients<sup>21</sup>. Myeloid differentiation factor (MyD) 88 holds its  
88 essential role in the regulation of innate gut immunity, and it is the direct downstream of TLRs and

89 cytokine receptors<sup>22</sup>. Nutrient signals such as peptidoglycan and lipopolysaccharide can activate  
90 TLR4-MyD88 dependent or independent pathways to regulate the expression of antimicrobial  
91 proteins like the Reg3 protein family that ultimately reprogramme the gut microbiome in IBD<sup>23-24</sup>.  
92 However, The role of EA on TLR4/MyD88 signaling to restore microbiome dysbiosis under  
93 inflammatory conditions remains unknown.

94 Our previous study has preliminarily demonstrated that 500~1000 mM supplementation of  
95 EA could alleviate weaning stress via re-programing gut microbiota<sup>13</sup>. To investigate the potential  
96 role of Etn as a nutrient signal in microbial-host interactions, the impact of Etn on colonic  
97 morphology, antimicrobial protein expression, inflammation-related cytokines, serum indicators,  
98 and gut microbiome were investigated.

99

## 100 **2. Materials and methods**

### 101 **2.1 Animals and Experimental Design**

102 All experiments were approved by the Animal Care and Use Committee of the Institute of  
103 Subtropical Agriculture, Chinese Academy of Sciences<sup>25</sup>. Thirty-six male ICR mice  
104 (three-week-old) were obtained from the SLAC Laboratory Animal Central (Changsha, China).  
105 All mice were housed under standard conditions, in pathogen-free colonies (temperature, 22 ±  
106 2 °C; relative humidity, 50 ± 5%; lighting cycle, 12 h/d), with free access to food and water.  
107 Intestinal colitis was induced in all mice by administration of 3% DSS (MP Biomedicals Shanghai,  
108 Co., Ltd. molecular weight=165.192 g/mol) in drinking water for seven days as previously  
109 described<sup>26</sup>. After that, thirty mice with colitis were obtained and randomly assigned into three  
110 groups (n =8) including the control group (Control) without EA (EA,  
111 Sigma-Aldrich,CAS141-43-5) supplements and two treatment groups that were supplemented  
112 with 500µM EA (LowEA) and 3000 µM EA(HighEA) in drinking water for two weeks(Figure  
113 1A).

114

### 115 **2.2 Colonic crypt isolation and DSS-treated organoid culture**

116 Mouse colonic crypts were harvested from three male 8-week-old ICR mice and cultured, as  
117 previously described<sup>27</sup>. In brief, 3 cm segments of the colon were minced and washed with cold  
118 DPBS(Stem cell,cat#37350) for 15~20 times until the supernatant is clear. The tissue pieces were  
119 digested in Gentle cell dissociation reagent( Stem cell,cat#07174) for 20~30min on a rocking  
120 platform at 20 rpm. The crypt compartment was collected by centrifugation and then washed twice  
121 with DMEM/F12 media(Stem cell,cat#36254). Then crypt pellets were resuspended with 25µl  
122 matrigel matrix (Corning,cat#356231) and 25µl medium per well and plated onto a 24-well tissue  
123 culture plated with complete mouse organoid growth medium(Stemcell, cat#06000) 10 µM  
124 Y-27632 ROCK inhibitor(Stem cell,cat#72302). After a week, mature colonic organoids were  
125 resuspended with matrigel matrix and medium as well as 3% DSS (MP Biomedicals,cat#  
126 02160110) to form matrigel domes(Figure 8A) and cultured as previously reported methods<sup>28</sup>.

127

### 128 **2.3 Morphological analysis**

129 Cross-sections of tissue samples from each group were preserved in 4% formaldehyde, and  
130 glutaraldehyde mixing fixative was prepared using standard paraffin embedding techniques. Then  
131 samples were sectioned at 5µm thickness and were stained with hematoxylin and eosin as  
132 previously described<sup>29</sup>. Villus height (VH) and crypt depth (CD) were measured under a light

133 microscope at 40× magnification using an image processing and analysis system (Leica Imaging  
134 Systems, Cambridge, UK). A minimum of 10 well-oriented, intact villi was measured from the  
135 crypt mouth to the villus tip and all measurements were made in 10 μm increments, and the count  
136 was repeated three times for each section per sample.

137

#### 138 **2.4 Immunohistochemistry Assay**

139 Tissue samples from colons were cut into 4-μm sections and processed for  
140 immunohistochemical staining as described<sup>30</sup>. And then, these samples were incubated with a  
141 primary antibody anti-occludin(Abcam,cat#ab31721) overnight at 4°C and then with  
142 poly-horseradish peroxidase-conjugated occludin for 60min at 22±4°C. Subsequently, the  
143 avidin-biotin-peroxidase complex and the substrate 3,3'-diaminobenzidine were applied for 2min  
144 and the samples were analyzed.

145

#### 146 **2.5 Enzyme-Linked Immunosorbent Assay**

147 Levels of IL1, IL6, TNFα, IL17, INFγ, sIgA, IL10, and IL22 in colonic segments were  
148 measured using ELISA kits according to the manufacturer's instructions as previous studies<sup>13</sup>. The  
149 ELISA kits are from (Meimian, Yutong Biological Technology Co., Ltd, Jiangsu, China). Briefly,  
150 supplied diluent buffer in the kits was used to dilute standards and serum samples. Next, 100 μL of  
151 the sample or standard in duplicate was added to the wells of a microtitre plate precoated with  
152 wash antibody. Diluent buffer was applied as a negative control. The plates were incubated for 2  
153 hours at 37°C. After incubation, 100 μL of biotin-antibody was added to each well after removing  
154 the liquid and incubated for 1 hour at 37°C. All wells were washed three times, with 200 μL  
155 volume of wash buffer. Next, 100 μL horseradish peroxidase-avidin was added to each well for 1  
156 hour at 37°C. After a final wash, 90 μL of the supplied TMB substrate was added and incubated  
157 for thirty minutes in the dark at 37°C. The reaction was stopped with 50 μL of the supplied stop  
158 solution, and absorbance was measured at 450 nm with a spectrophotometer.

159

#### 160 **2.6 Serum biochemical analysis**

161 Serum levels of total bile acid(TBA) were detected by the fully automatic biochemical  
162 analyzer(Shenzhen Mindray, BS-190), as described in our previous studies<sup>25</sup>. Serum aspartate  
163 aminotransferase (AST), alanine aminotransferase (ALT) and dual amine oxidase(DAO) were  
164 determined via commercial kits, and all determinations were done in triplicate and performed  
165 according to the manufacturer's instructions<sup>25</sup>.

166

#### 167 **2.7 Quantifications Real-Time PCR**

168 Total RNA of jejunal mucosa was extracted using TRIZOL reagent (Invitrogen, Carlsbad,  
169 CA). The first-strand cDNA was then synthesized using a reverse transcription kit (TaKaRa,  
170 Dalian, China) following the manufacturer's instruction, as described in our previous study<sup>29</sup>.  
171 qPCR was performed using primers shown in the supplemental materials (Sup\_Table 1). Briefly, 1  
172 μL cDNA template was added to a total volume of 10 μL assay solution containing 5 μL SYBR  
173 Green mix, 0.2 μL Rox, 3 μL deionized H<sub>2</sub>O, and 0.4 μL of each of the forward and reverse  
174 primers. The comparative Ct value method was used to quantitate mRNA expression relative to  
175 β-actin. All samples were run in triplicate and the average values were calculated.

#### 176 **2.8 Western Blot Analysis**

177 Total proteins from intestinal tissues were extracted with a commercially available kit using  
178 lysis buffer containing 1‰ DTT, 5‰ PMSF and 1‰ protease inhibitor (KeyGEN BioTech,  
179 Nanjing, China). Following intermittent vortexing for 20 min on ice, samples were centrifuged at  
180 13,000 rpm for 15 min at 4 °C. Protein content was determined using the BCA assay (Pierce  
181 Biotechnology, Rockford, IL, USA), and Western blotting analysis was performed. Briefly, 20 µg  
182 protein per lane was separated by SDS-PAGE and blotted onto nitrocellulose membranes. Primary  
183 antibody against occluding (Abcam,cat#ab31721),anti-TLR4(Abcam,cat#13556) and  
184 anti-MyD88(Abcam,cat#133739) and recombinant anti-beta actin antibody (Abcam,cat#ab115777)  
185 were incubated with the membrane overnight at 4 °C. After incubating overnight with the  
186 secondary antibody, the membrane was exposed to EZ-ECL (Biological Industries, Cromwell, CT,  
187 USA) for protein band detection, and all original images of WB results could be found in  
188 supplemental materials(Sup\_Figure1).

189

## 190 **2.9 Microbial sequencing of colon contents**

191 Total bacterial DNA from approximately 0.25 g of colon contents was extracted using a  
192 QIAamp DNA Stool Mini Kit (Qiagen, Hilden, Germany) according to the manufacturer's  
193 instructions as described<sup>13</sup>. The diversity and composition of the bacterial community were  
194 determined by high-throughput sequencing of the microbial 16S rRNA genes. The V4  
195 hypervariable region of the 16S rRNA genes was PCR amplified using 515F:  
196 5'-GTGCCAGCMGCCGCGTAA-3' and 806R: 5'-GGACTACHVGGGTWTCTAAT-3' primers,  
197 Illumina adaptors, and molecular barcodes. Paired-end sequencing was performed on the Illumina  
198 HiSeq 2500 platform (Novogene, Beijing, China) to obtain raw 16s data. The assembled HiSeq  
199 sequences obtained by this research were submitted to the NCBI's Sequence Read Archive with  
200 project ID: PRJNA551369 for open access.

201

## 202 **2.10 Bioinformatic analysis and metagenomic predictions**

203 Raw 16S data sequences The first-strand before being screened and assembled using the  
204 QIIME (v1.9.1) and FLASH software packages as previously described<sup>25</sup>. UPARSE (v7.0.1001)  
205 was used to analyze high-quality sequences and determine OTUs. Subsequently, high-quality  
206 sequences were aligned against the SILVA reference database (<https://www.arb-silva.de/>) and  
207 clustered into OTUs at a 97% similarity level using the UCLUST algorithm  
208 ([https://drive5.com/usearch/manual/uclust\\_algo.html](https://drive5.com/usearch/manual/uclust_algo.html)). Each OTU was assigned to a taxonomic  
209 level with the Ribosomal Database Project Classifier program v2.20 (<https://rdp.cme.msu.edu/>), as  
210 previously reported<sup>13</sup>. Functional metagenomes of all samples were predicted using Tax4Fun R  
211 packages(<http://tax4fun.gobics.de>)<sup>31</sup>. Further statistical interrogation and graphical depictions of  
212 microbiome data were performed by R software (v3.6.0) and related packages.

213

## 214 **2.11 Statistical Analysis**

215 Data were analyzed using the General Linear Model (GLM) procedure in SAS (SAS Institute  
216 Inc., Cary, NC) to identify significant treatment effects and interactions. All data were presented as  
217 Least Squares means plus pooled SEM. The Tukey multiple comparison tests were used to  
218 evaluate the differences among the treatments. Probability values  $\leq 0.05$  were taken to indicate  
219 statistical significance.

220

## 221 3. Results

### 222 3.1 Impacts of ethanolamine treatment on body weight and colonic morphology

223 There were no differences in the BW, ADF, and water intake among the three groups  
224 (Figure1 C-D). Compared with control group, Etn decreased the proximal colonic crypt depth ( $P$   
225  $< 0.0001$ , Figure1 F-H) and increased villus/crypt ratio ( $P < 0.0001$ ). Meanwhile, EA  
226 significantly increased the villus height and villus/crypt ratios of distal colon ( $P < 0.05$ ).

227

228

### 229 3.2 Ethanolamine altered the composition of colonic microbiota

230 Microbial diversity indicators (Shannon and Simpson) were significantly in the low EA treated  
231 group than the control group ( $P < 0.0001$ ; Figure 2 A&B). Besides, microbial abundance  
232 represented by Chao1 ( $P = 0.014$ , Figure2 C) and ACE (Figure2 D) were significantly high in the  
233 low EA treated group than the high EA treated group. Phylogenetic diversity indicator  
234 PD\_whole\_tree was remarkably low than both the control group and the low EA treated  
235 group (Figure2 E). But no difference in observed species was found (Figure2 F).

236 The dominant phylum constituted by *Bacteroides*, *Firmicutes*, *Proteobacteria*, and  
237 *Verrucomicrobia*, likewise, *Akkermansia*, *Bacteroides*, *Blautia*, *Desulfovibrio*, *Helicobacter*, and  
238 *Intestinimonas* are the most abundant at the genus level (Figure2 G). Besides, the heat tree analysis  
239 leveraged the hierarchical structure of taxonomic differences between the control group and EA  
240 treated group. *Unidentified\_Clostridiales* and *unidentified\_bacteria* significantly altered in two  
241 branches as a comparison between the control group and the EA treated group (Figure2 H).  
242 Meanwhile, only *unidentified\_clostridiales* significantly altered when compared to the control  
243 group and the high EA treated group (Figure2 I).

244 Furthermore, heatmap analysis on the top 40 most-abundant genus was performed (Figure3 A).  
245 Notably, *Blautia*, *Roseburia*, *Lactobacillus* hold more abundance in the high EA treated group  
246 while *Faecalibaculum*, *Candidatus\_Saccharimonas*, *Alloprevotella*, and *Lachnoclostridium*.et.al  
247 showed to be more abundant in the low EA treated group. Lefse analysis of the whole microbiome  
248 showed that differences among groups mainly occurred at the downstream of the family  
249 level (Figure3 B). In that case, the T-test analysis of microbial composition was also  
250 performed (Figure3 C), and results presented that *Helicobacteraceae*, *unidentified\_Clostridiales*  
251 increased while *Rikenellaceae* were reduced in the low EA treated group ( $P < 0.05$ ). Only  
252 *unidentified\_Clostridiales* were significantly increased in high EA treated groups.

253

### 254 3.3 Metabolic functions driven by different EA levels

255 PCA analysis based on metagenome showed no apparent separations among groups (Figure 4  
256 A). *Carbohydrate metabolism*, *Membrane transport*, *Replication and repair*, *Translation*, *Amino*  
257 *acid metabolism*, *Energy metabolism*, *Nucleotide metabolism*, *Glycan biosynthesis and*  
258 *metabolism*, *Metabolism of cofactors and vitamins* and *Signal transduction* were the top ten most  
259 abundant pathways at KEGG level 2 (Figure4 B). Heatmap illustrated the composition of KEGG  
260 level 3 pathways that enriched in each group (Figure4 C). *Glycan biosynthesis*, *Metabolism of*  
261 *cofactors and vitamins*, and *Nucleotide metabolism* showed more richness in the high EA group.  
262 However, no statistically significant differences between the control group and high EA treatment  
263 were observed at KEGG level 3. But significant variations between the control group and the low

264 EA treated group were identified and that *Oxidative phosphorylation, Lipopolysaccharide*  
265 *biosynthesis, Arginine and proline metabolism, Folate biosynthesis* and *Biotin metabolism* were  
266 more abundant in the low EA group (Figure4 D).

267

268

### 269 **3.4 Impacts of EA treatment on body weight and colonic morphology**

270 EA treatments had no impacts on body weight, average daily food and water intake (**Figure**  
271 **5**). Compared with the control group, the proximal colonic crypt depth of both EA treated groups  
272 showed significant reductions ( $P < 0.0001$ , **Figure5 F-H**) and villus/crypt ratio significantly  
273 increased in the high EA treated group ( $P < 0.0001$ ). Meanwhile, EA treatments significantly  
274 increased the villus height and villus/crypt ratios of distal colon ( $P < 0.05$ ).

275

276

### 277 **3.5 Ethanolamine altered intestinal permeability and antimicrobial protein mRNA**

#### 278 **expression**

279 The mRNA and protein expression of occludin in the low EA treated group were increased  
280 compared with those in control groups ( $P < 0.001$ , Figure6 A-D). Antimicrobial protein Reg3 $\beta$ ,  
281 BD2, and MUC2 mRNA were significantly up-regulated in EA treated groups ( $P < 0.005$ ). Relative  
282 expression of BD1 was remarkably more significant in the low EA treated group than in the  
283 control group ( $P < 0.05$ , **Figure6 F**).

284

285

### 286 **3.6 Ethanolamine changed the production and mRNA expression of inflammation-related**

#### 287 **cytokines and Serum indicators**

288 For mucosal inflammation-related cytokines in the colon, the concentration of IL1, IL6, IL17,  
289 TNF $\alpha$ , and INF $\gamma$  showed a significant reduction in EA treated groups ( $P < 0.01$ ). Conversely, sIgA  
290 was significantly up-regulated in both low and high EA treated groups (Table 1).

291

292 The concentration of serum ALT and AST were significantly down-regulated in the high EA  
293 treated group compared with the control group ( $P < 0.05$ , Figure7 A&B) and no differences in  
294 TBA and DAO concentration were found in this study (Figure7 C&D). The mRNA expression of  
295 IL1 $\beta$  showed a significant reduction in the EA treated groups, and the expression of IL6, IL10,  
296 IL22, sIgA and TNF $\alpha$  mRNA were significantly up-regulated ( $P < 0.05$ , E-L).

297

298

### 299 **3.7 Ethanolamine promoted TLR4/MyD88 dependent signaling in inflamed colon tissues.**

300 As the dramatic changes in microbiota discussed above, we further determine whether EA  
301 altered gut microbiota composition rely on TLR4/MyD88 dependent signaling. Compared with  
302 control group, the protein expression of TLR4 in LowEA and MyD88 in HighEA were  
303 significantly up-regulated (Figure8 A). The mRNA expression of MyD88 was up-regulated in the  
304 high EA treated group (Figure8 A). However, while TLR4 only showed a significant increase in  
305 the low EA treated group ( $P < 0.05$ , Figure8 C).

306

### 307 **3.8 Ethanolamine increased the expression of TLR4 and occludin in the DSS-treated**

308 **organoid model.**

309 To further determine the effects of EA on TLR4 expression and intestinal permeability,  
310 colonic organoids from intestinal crypts were directly derived from three male 8-week-old ICR  
311 mice for the establishment of DSS-treated organoid model (Figure9 A&B). The preliminary  
312 experiment showed that organoids could not survive in a 3000 $\mu$ M EA environment. In that case,  
313 ethanolamine treatment with 0 $\mu$ M, 100 $\mu$ M, and 500 $\mu$ M were performed in the DSS-treated  
314 organoid model. 500 $\mu$ M ethanolamine supplementation in the organoid growth medium  
315 significantly increased the surface area and budding rate of colonic organoids ( $P < 0.05$ , Figure8  
316 C&D). TLR4 protein expression tended to be more significant in the 500 $\mu$ M EA treated group  
317 (Figure 9 G&H). The mRNA expression of TLR4 in 500 $\mu$ M ethanolamine treated group and  
318 MyD88 in both 100 $\mu$ M and 500 $\mu$ M ethanolamine treated group showed a significant increase  
319 (Figure 9 I-J). For mucosal permeability, occludin mRNA was significantly up-regulated in  
320 500 $\mu$ M ethanolamine treated group (Figure9 K-L). The relative mRNA expression of all  
321 antimicrobial proteins, including Reg3 $\beta$ , BD1, BD2, and MUC2, were also detected on colonic  
322 organoids, and only Reg3 $\beta$  showed a significant up-regulation in 500 $\mu$ M ethanolamine treated  
323 group (Figure9 M).

324

325

326 **Discussion**

327 Nutrition signal to the host-microbiome interactions ultimately affect the pathological process  
328 and health outcomes<sup>3-5, 15</sup>. Dramatic alterations in gut microbiota and barrier dysfunction reflecting  
329 a different ecological microenvironment in IBD Patients and mice models compared with health  
330 conditions have been demonstrated by extensive works<sup>1, 3-4, 6, 23</sup>. Patients with Crohn's disease  
331 showed reduced diversity of fecal microbiota and held the gut microbiome that dominantly  
332 constituted by *Proteobacteria*, *Actinobacteria*, *Firmicutes*, and *Bacteroidetes*<sup>32</sup>. Dietary  
333 intervention with optimal dietary components such as fiber, short-chain fatty acids, and tryptophan  
334 has been proved to be able to reduce colonic inflammation and cell proliferation and shift the  
335 progression of IBD through the gut microbiota<sup>3, 33</sup>. Sphingolipids like PE and EA have been  
336 detected as the most differentially abundant metabolite in stool and intestinal tissue resections  
337 from IBD patients<sup>3, 15</sup>. Here, we tried to demonstrate the role of ethanolamine as an essential lipid  
338 signal in mediating host-microbial interactions and its impacts on colonic barrier functions and  
339 inflammation.

340 The present study showed that 500  $\mu$ M EA increased microbial diversity. However, higher  
341 concentration of EA (3000 $\mu$ M) decreased microbial abundance. Gut microbiome dysbiosis in IBD  
342 has been identified as a decrease in microbial diversity and abundance due to a shift in the balance  
343 between commensal and potentially pathogenic bacteria<sup>34</sup>. These changes indicated that EA could  
344 change intestinal microbial composition of the DSS-treated mice. The dominant phylum in EA

345 treated groups constituted by *Bacteroides*, *Firmicutes*, *Proteobacteria*, and *Verrucomicrobia* ,  
346 *Akkermansia*, *Bacteroides*, *Blautia*, *Desulfovibrio*, *Helicobacter*. A recent study highlighted the  
347 role of *Bacteroides*-derived sphingolipids in host-microbe symbiosis and inflammation, where  
348 IBD patients have decreased sphingolipid production by *Bacteroides*, but increased host-produced  
349 sphingolipid abundance in gut<sup>15</sup>. *Akkermansia*, *Bacteroides*, and *Blautia* are associated with the  
350 production of beneficial microbial-derived metabolites such as short-chain fatty acids that have



351 been proved to be a key regulator in IBD<sup>3</sup>. Studies have shown that short-chain fatty acids can  
352 inhibit histone deacetylases in colonocytes and intestinal immune cells to downregulate  
353 proinflammatory cytokines and induce apoptosis in cancer cell lines<sup>1-2</sup>. Ethanolamine can generate  
354 acetate<sup>10</sup>, that may be responsible for the beneficial role of EA in altering the gut microbiota. Here,  
355 we further analyzed the metabolic functions of the gut microbiome via applying theTax4fun  
356 algorithm package<sup>31</sup>. Significant variations between the control group and the low EA treated  
357 group were identified, and *Oxidative phosphorylation*, *Lipopolysaccharide biosynthesis*, *Arginine*  
358 *and proline metabolism*, *Folate biosynthesis* and *Biotin metabolism* were more abundant in the  
359 low EA treated group. These metabolic changes are coincident with studies that reported  
360 beneficial impacts of dietary fiber intervention in IBD<sup>3, 34</sup>. These results may indicate that EA  
361 could shift the composition and metabolic functions of colonic microbiota to restore microbial  
362 dysbiosis.

363 In this study, EA decreased the proximal colon crypt depth and increased the distal villus  
364 height. Previous study showed that Gut microbiota, including *Escherichia*, *Enterococcus*,  
365 *Bacteroides*, and *Clostridium* genera, could promote colorectal carcinogenesis by increasing  
366 aberrant crypt foci induced by 1, 2-dimethylhydrazine<sup>3</sup>. Under health conditions, the mucus layer  
367 covers the whole epithelial surface, which confers the lubrication, hydration, and protection of the  
368 underlying epithelial cells and the epithelial barrier integrity of intestines<sup>36-37</sup>. Tight junction  
369 proteins like occludin and ZO1 also contribute to the regulation of intestinal permeability that  
370 physically against the invasion of gut bacteria<sup>37</sup>. Antimicrobial proteins like BD1, BD2, and Reg3  
371 family are often secreted by Paneth cells to clear up the pathogens and promote epithelial  
372 regeneration following intestinal infection<sup>2, 23, 25</sup>. However, IBD patients often suffered from  
373 prolonged enteric inflammation that ultimately damages intestinal epithelia, and subsequently  
374 leads to increased intestinal permeability that causing pathogenic infections<sup>35</sup>. For instance,  
375 *Akkermansia* recently has been proved to be a probiotic that may be beneficial to the IBD therapy,  
376 and direct administration of *Akkermansia* has been demonstrated to alleviate obesity-related  
377 metabolic disturbances and increase Muc2 production in DIO-mice, thus improving mucus layer  
378 thickness and intestinal permeability<sup>38-39</sup>. In this study, EA supplementation increased the  
379 expression of occludin, Reg3 $\beta$ , BD2, MUC2, and BD1. These results were indicating that EA  
380 may improve colonic barrier functions via reducing gut permeability and increasing antimicrobial  
381 protein secretion.

382 IBD patients consistently suffered from chronic inflammation characterized by up-regulated  
383 proinflammatory cytokines such as IL1, IL6, IL17, TNF $\alpha$ , and INF $\gamma$  that contribute to the  
384 establishment of tumor-associated immune microenvironment<sup>14</sup>. These proinflammatory cytokines  
385 are produced by CD4+ T helper (Th) lineage cells via IL12-Th1 and IL-23-Th17 pathways in IBD  
386 patients and mice with colitis<sup>40-41</sup>. Alterations in gut microbiota also have been demonstrated to be  
387 responsible for the regulation of Th1/Th17 immune response in IBD<sup>2, 40</sup>. Besides, sIgA  
388 up-regulated in the colon of IBD patients than that in healthy people<sup>1</sup>. Secretory IgA is generated  
389 by the combined function of plasma cells producing multimeric IgA and epithelial cells expressing  
390 pIgR, and it can protect the mucosal barrier against toxins and bacteria infections<sup>42</sup>. In this study,  
391 IL1, IL6, IL17, TNF $\alpha$ , and INF $\gamma$  showed a significant reduction in EA treated groups. Conversely,  
392 sIgA was significantly up-regulated in EA treated groups. Further, IL12-Th1 and IL23-Th17  
393 pathway-related cytokine gene expression were investigated. IL1 $\beta$  mRNA showed a significant  
394 reduction in EA treated groups. IL6, IL10, IL22, and sIgA mRNA were significantly up-regulated

395 in the high EA treated group. However, relative TNF $\alpha$  mRNA expression showed a significant rise  
396 in EA treated groups. These results indicated that EA treatments may alleviate colonic  
397 inflammation via down-regulating both IL-12-Th1 and IL23-Th17 pathways and increase the sIgA  
398 secretion. ALT and AST are liver-specific enzymes released into serum following acute liver  
399 damage<sup>29</sup>. Both IBD patients and mice models have been demonstrated to hold high serum AST  
400 and ALT concentrations as a result of inflammatory liver injury<sup>43</sup>. In this research, both serum ALT  
401 and AST were significantly down-regulated in the high EA treated group in DSS-treated mice.  
402 These results indicated that EA may had a beneficial impact on liver inflammation, further studies  
403 need to elucidate it.

404 To date, most EA signaling related researches were focused on bacterial utilization and  
405 CDP-EA pathway in PE synthesis<sup>11, 17, 19-20</sup>. Our previous study has demonstrated that  
406 ethanolamine could promote the proliferation of IPEC-J1 cells by regulating the mTOR signaling  
407 pathway and mitochondrial function<sup>44</sup>. Toll-like receptors (TLRs) have a vital role in mucosal  
408 immune responses to gut bacteria, and the TLR4 expression was always dramatically up-regulated  
409 in the intestines of IBD patients<sup>21</sup>. Myeloid differentiation factor 88 holds its essential role in the  
410 regulation of innate gut immunity, and it is the direct downstream of TLRs and cytokine  
411 receptors<sup>22</sup>. Nutrient signals such as peptidoglycan and lipopolysaccharide can activate  
412 TLR4-MyD88 dependent or independent pathways to regulate the expression of antimicrobial  
413 proteins like the Reg3 protein family that ultimately reprogramme the gut microbiome in IBD<sup>23-24</sup>.  
414 Here, in the DSS-treated mice model, TLR4 protein was significantly up-regulated in EA treated  
415 groups, and MyD88 protein showed significantly up-regulated in the high EA treated group.  
416 However, MyD88 mRNA was up-regulated in the high EA group, while TLR4 only showed a  
417 significant increase in the low EA group. Crypt-derived colonic organoids can spontaneously  
418 generate crypt-villus like units and constituting by all types of intestinal cells. And so that colonic  
419 organoids hold the cellular and structural heterogeneity that highly coincident with the  
420 physiological nature of intestinal epithelium and much better than traditional cell lines in  
421 characterizing the immunology of intestinal barrier<sup>37</sup>. Hence, a DSS-induced colonic organoid  
422 inflammation model was established to verify these findings. Results showed that TLR4 protein  
423 expression tended to be more significant in the 500 $\mu$ M EA treated group. At the same time, TLR4  
424 mRNA showed a significant increase in 500 $\mu$ M EA treated group. MyD88 mRNA expression was  
425 significantly up-regulated in both 100 $\mu$ M, and 500 $\mu$ M EA treated group. These results  
426 demonstrated that EA could exert impacts on the regulation of TLR4/MyD88 signals, and  
427 differences between mice model and organoid model may be caused by gut microbiota<sup>3</sup>, and EA  
428 may mediate host-microbiome cross-talk via TLR4/MyD88 dependent signaling in the inflamed  
429 gut.

430 In conclusion, this research demonstrated that EA may alleviate colonic inflammatory  
431 immunoreactions and microbiome dysbiosis via TLR4/MyD88 dependent signaling. EA treatment  
432 improved intestinal barrier functions by up-regulating the expression of occluding and  
433 antimicrobial protein. EA treatment alleviated colonic inflammatory response by down-regulating  
434 related cytokines (IL1, IL6, IL17, TNF $\alpha$ , and INF $\gamma$ ) and increasing sIgA secretion. Results from  
435 both DSS-treated mice and DSS-treated colonic organoids indicated that EA may directly target  
436 the TLR4/MyD88 dependent pathway to mediate host-microbial interactions in intestinal  
437 inflammation.

438 **Acknowledgments**

439 Jian Zhou thanks professor Xiong, Wan, and Yin for their support and encouragement. Zhou,  
440 Xiong, and Yin thank Pan Huang for her technical support.

441

#### 442 **Funding**

443 This project was supported by National Program on Key Basic Research Project  
444 (2017YFD0500504, 2016YFD0501201), the National Natural Science Foundation of China  
445 (31702127), Natural Science Foundation of Hunan Province (2018JJ1028) and the Young Elite  
446 Scientists Sponsorship Program by CAST (2018QNRC001). Research Foundation of Education  
447 Bureau of Hunan Province, China (18B476).

448

#### 449 **Supplemental Materials**

450

451 See the file“Supplemental materials. docx”

452

#### 453 **References**

454 1. Scaldaferri, F.; Gerardi, V.; Lopetuso, L. R.; Del Zompo, F.; Mangiola, F.; Boskoski, I.;

455 Bruno, G.; Petito, V.; Laterza, L.; Cammarota, G.; Gaetani, E.; Sgambato, A.; Gasbarrini, A.,

456 Gut Microbial Flora, Prebiotics, and Probiotics in IBD: Their Current Usage and Utility. *Biomed*

457 *Research International* **2013**.

458 2. Wong, S. H.; Yu, J., Gut microbiota in colorectal cancer: mechanisms of action and

459 clinical applications. *Nat Rev Gastroenterol Hepatol* **2019**, *16* (11), 690-704.

460 3. Lavelle, A.; Sokol, H., Gut microbiota-derived metabolites as key actors in inflammatory

461 bowel disease. *Nat Rev Gastroenterol Hepatol* **2020**, *17* (4), 223-237.

462 4. Cani, P. D.; Jordan, B. F., Gut microbiota-mediated inflammation in obesity: a link with

463 gastrointestinal cancer. *Nat Rev Gastroenterol Hepatol* **2018**, *15* (11), 671-682.

464 5. Round, J. L.; Mazmanian, S. K., The gut microbiota shapes intestinal immune responses

465 during health and disease. *Nat Rev Immunol* **2009**, *9* (5), 313-23.

466 6. Honda, K.; Littman, D. R., The microbiome in infectious disease and inflammation. *Annu*

467 *Rev Immunol* **2012**, *30*, 759-95.

468 7. Ren, W.; Chen, S.; Yin, J.; Duan, J.; Li, T.; Liu, G.; Feng, Z.; Tan, B.; Yin, Y.; Wu, G.,

- 469 Dietary arginine supplementation of mice alters the microbial population and activates  
470 intestinal innate immunity. *J Nutr* **2014**, *144* (6), 988-95.
- 471 8. Gao, J.; Xu, K.; Liu, H.; Liu, G.; Bai, M.; Peng, C.; Li, T.; Yin, Y., Impact of the Gut  
472 Microbiota on Intestinal Immunity Mediated by Tryptophan Metabolism. *Front Cell Infect*  
473 *Microbiol* **2018**, *8*, 13.
- 474 9. Hamer, H. M.; Jonkers, D.; Venema, K.; Vanhoutvin, S.; Troost, F. J.; Brummer, R. J.,  
475 Review article: the role of butyrate on colonic function. *Aliment Pharmacol Ther* **2008**, *27* (2),  
476 104-19.
- 477 10. Zhou, J.; Xiong, X.; Wang, K.; Zou, L.; Lv, D.; Yin, Y., Ethanolamine Metabolism in the  
478 Mammalian Gastrointestinal Tract: Mechanisms, Patterns, and Importance. *Curr Mol Med*  
479 **2017**, *17*(2), 92-99.
- 480 11. Wu, Y.; Chen, K. S.; Xing, G. S.; Li, L. P.; Ma, B. C.; Hu, Z. J.; Duan, L. F.; Liu, X. G.,  
481 Phospholipid remodeling is critical for stem cell pluripotency by facilitating  
482 mesenchymal-to-epithelial transition. *Sci Adv* **2019**, *5*(11).
- 483 12. Patel, D.; Witt, S. N., Ethanolamine and Phosphatidylethanolamine: Partners in Health  
484 and Disease. *Oxid Med Cell Longev* **2017**, *2017*, 1-18.
- 485 13. Zhou, J.; Xiong, X.; Wang, K. X.; Zou, L. J.; Ji, P.; Yin, Y. L., Ethanolamine enhances  
486 intestinal functions by altering gut microbiome and mucosal anti-stress capacity in weaned rats.  
487 *Br J Nutr* **2018**, *120* (3), 241-249.
- 488 14. Lin, Y. C.; Lin, Y. C.; Chen, C. J., Cancers Complicating Inflammatory Bowel Disease. *N*  
489 *Engl J Med* **2015**, *373* (2), 194-5.
- 490 15. Brown, E. M.; Ke, X. B.; Hitchcock, D.; Jeanfavre, S.; Avila-Pacheco, J.; Nakata, T.;

- 491 Arthur, T. D.; Fornelos, N.; Heim, C.; Franzosa, E. A.; Watson, N.; Huttenhower, C.; Haiser, H.  
492 J.; Dillow, G.; Graham, D. B.; Finlay, B. B.; Kostic, A. D.; Porter, J. A.; Vlamakis, H.; Clish, C.  
493 B.; Xavier, R. J., Bacteroides-Derived Sphingolipids Are Critical for Maintaining Intestinal  
494 Homeostasis and Symbiosis. *Cell Host & Microbe* **2019**, *25* (5), 668-+.
- 495 16. Thiennimitr, P.; Winter, S. E.; Winter, M. G.; Xavier, M. N.; Tolstikov, V.; Huseby, D. L.;  
496 Sterzenbach, T.; Tsolis, R. M.; Roth, J. R.; Baumler, A. J., Intestinal inflammation allows  
497 Salmonella to use ethanolamine to compete with the microbiota. *Proc Natl Acad Sci U S A*  
498 **2011**, *108* (42), 17480-5.
- 499 17. Ormsby, M. J.; Logan, M.; Johnson, S. A.; McIntosh, A.; Fallata, G.; Papadopoulou, R.;  
500 Papachristou, E.; Hold, G. L.; Hansen, R.; Ijaz, U. Z.; Russell, R. K.; Gerasimidis, K.; Wall, D.  
501 M., Inflammation associated ethanolamine facilitates infection by Crohn's disease-linked  
502 adherent-invasive Escherichia coli. *EBioMedicine* **2019**, *43*, 325-332.
- 503 18. Kaval, K. G.; Singh, K. V.; Cruz, M. R.; DebRoy, S.; Winkler, W. C.; Murray, B. E.; Garsin,  
504 D. A., Loss of Ethanolamine Utilization in Enterococcus faecalis Increases Gastrointestinal  
505 Tract Colonization. *mBio* **2018**, *9* (3).
- 506 19. Anderson, C. J.; Clark, D. E.; Adli, M.; Kendall, M. M., Ethanolamine Signaling Promotes  
507 Salmonella Niche Recognition and Adaptation during Infection. *PLoS Pathog* **2015**, *11* (11),  
508 e1005278.
- 509 20. Moore, T. C.; Escalante-Semerena, J. C., The EutQ and EutP proteins are novel acetate  
510 kinases involved in ethanolamine catabolism: physiological implications for the function of the  
511 ethanolamine metabolosome in Salmonella enterica. *Mol Microbiol* **2016**, *99* (3), 497-511.
- 512 21. Cario, E.; Podolsky, D. K., Differential alteration in intestinal epithelial cell expression of

- 513 toll-like receptor 3 (TLR3) and TLR4 in inflammatory bowel disease. *Infect Immun* **2000**, *68*  
514 (12), 7010-7.
- 515 22. Koliaraki, V.; Chalkidi, N.; Henriques, A.; Tzaferis, C.; Polykratis, A.; Waisman, A.; Muller,  
516 W.; Hackam, D. J.; Paspapakis, M.; Kollias, G., Innate Sensing through Mesenchymal  
517 TLR4/MyD88 Signals Promotes Spontaneous Intestinal Tumorigenesis. *Cell Reports* **2019**, *26*  
518 (3), 536-+.
- 519 23. Chu, H.; Mazmanian, S. K., Innate immune recognition of the microbiota promotes  
520 host-microbial symbiosis. *Nat Immunol* **2013**, *14* (7), 668-75.
- 521 24. Chaniotou, Z.; Giannogonas, P.; Theoharis, S.; Teli, T.; Gay, J.; Savidge, T.; Koutmani, Y.;  
522 Brugni, J.; Kokkotou, E.; Pothoulakis, C.; Karalis, K. P., Corticotropin-releasing factor  
523 regulates TLR4 expression in the colon and protects mice from colitis. *Gastroenterology* **2010**,  
524 *139* (6), 2083-92.
- 525 25. Zhou, J.; Xiong, X.; Yin, J.; Zou, L.; Wang, K.; Shao, Y.; Yin, Y., Dietary Lysozyme Alters  
526 Sow's Gut Microbiota, Serum Immunity and Milk Metabolite Profile. *Front Microbiol* **2019**, *10*,  
527 177.
- 528 26. Zhai, Z.; Zhang, F.; Cao, R.; Ni, X.; Xin, Z.; Deng, J.; Wu, G.; Ren, W.; Yin, Y.; Deng, B.,  
529 Cecropin A Alleviates Inflammation Through Modulating the Gut Microbiota of C57BL/6 Mice  
530 With DSS-Induced IBD. *Front Microbiol* **2019**, *10*, 1595.
- 531 27. Miyoshi, H.; Stappenbeck, T. S., In vitro expansion and genetic modification of  
532 gastrointestinal stem cells in spheroid culture. *Nat Protoc* **2013**, *8* (12), 2471-82.
- 533 28. Wen, Y. A.; Li, X.; Goretsky, T.; Weiss, H. L.; Barrett, T. A.; Gao, T., Loss of PHLPP  
534 protects against colitis by inhibiting intestinal epithelial cell apoptosis. *Biochim Biophys Acta*

- 535    **2015**, *1852* (10 Pt A), 2013-23.
- 536    29. Zou, L.; Xiong, X.; Liu, H.; Zhou, J.; Liu, Y.; Yin, Y., Effects of dietary lysozyme levels on  
537    growth performance, intestinal morphology, immunity response and microbiota community of  
538    growing pigs. *J Sci Food Agric* **2019**, *99* (4), 1643-1650.
- 539    30. Xiong, X.; Zhou, J.; Liu, H.; Tang, Y.; Tan, B.; Yin, Y., Dietary lysozyme supplementation  
540    contributes to enhanced intestinal functions and gut microflora of piglets. *Food Funct* **2019**, *10*  
541    (3), 1696-1706.
- 542    31. Asshauer, K. P.; Wemheuer, B.; Daniel, R.; Meinicke, P., Tax4Fun: predicting functional  
543    profiles from metagenomic 16S rRNA data. *Bioinformatics* **2015**, *31* (17), 2882-4.
- 544    32. Manichanh, C.; Rigottier-Gois, L.; Bonnaud, E.; Gloux, K.; Pelletier, E.; Frangeul, L.; Nalin,  
545    R.; Jarrin, C.; Chardon, P.; Marteau, P.; Roca, J.; Dore, J., Reduced diversity of faecal  
546    microbiota in Crohn's disease revealed by a metagenomic approach. *Gut* **2006**, *55* (2), 205-11.
- 547    33. O'Keefe, S. J. D.; Li, J. V.; Lahti, L.; Ou, J. H.; Carbonero, F.; Mohammed, K.; Pasma, J.  
548    M.; Kinross, J.; Wahl, E.; Ruder, E.; Vippera, K.; Naidoo, V.; Mtshali, L.; Tims, S.; Puylaert, P.  
549    G. B.; DeLany, J.; Krasinskas, A.; Benefiel, A. C.; Kaseb, H. O.; Newton, K.; Nicholson, J. K.;  
550    de Vos, W. M.; Gaskins, H. R.; Zoetendal, E. G., Fat, fibre and cancer risk in African  
551    Americans and rural Africans. *Nature Communications* **2015**, *6*.
- 552    34. Ni, J.; Wu, G. D.; Albenberg, L.; Tomov, V. T., Gut microbiota and IBD: causation or  
553    correlation? *Nat Rev Gastroenterol Hepatol* **2017**, *14* (10), 573-584.
- 554    35. Fries, W.; Belvedere, A.; Vetrano, S., Sealing the Broken Barrier in IBD: Intestinal  
555    Permeability, Epithelial Cells and Junctions. *Current Drug Targets* **2013**, *14* (12), 1460-1470.
- 556    36. Witten, J.; Samad, T.; Ribbeck, K., Selective permeability of mucus barriers. *Curr Opin*

- 557 *Biotech* **2018**, *52*, 124-133.
- 558 37. Bar-Ephraim, Y. E.; Kretschmar, K.; Clevers, H., Organoids in immunological research.  
559 *Nat Rev Immunol* **2020**, *20* (5), 279-293.
- 560 38. Anhe, F. F.; Pilon, G.; Roy, D.; Desjardins, Y.; Levy, E.; Marette, A., Triggering  
561 *Akkermansia* with dietary polyphenols: A new weapon to combat the metabolic syndrome? *Gut*  
562 *Microbes* **2016**, *7* (2), 146-53.
- 563 39. Everard, A.; Belzer, C.; Geurts, L.; Ouwerkerk, J. P.; Druart, C.; Bindels, L. B.; Guiot, Y.;  
564 Derrien, M.; Muccioli, G. G.; Delzenne, N. M.; de Vos, W. M.; Cani, P. D., Cross-talk between  
565 *Akkermansia muciniphila* and intestinal epithelium controls diet-induced obesity. *P Natl Acad*  
566 *Sci USA* **2013**, *110* (22), 9066-9071.
- 567 40. Moschen, A. R.; Tilg, H.; Raine, T., IL-12, IL-23 and IL-17 in IBD: immunobiology and  
568 therapeutic targeting. *Nat Rev Gastroenterol Hepatol* **2019**, *16* (3), 185-196.
- 569 41. Galvez, J., Role of Th17 Cells in the Pathogenesis of Human IBD. *ISRN Inflamm* **2014**,  
570 *2014*, 928461.
- 571 42. Pabst, O.; Slack, E., IgA and the intestinal microbiota: the importance of being specific.  
572 *Mucosal Immunology* **2020**, *13* (1), 12-21.
- 573 43. Oliveira, G. R.; Teles, B. C. V.; Brasil, E. F.; Souza, M. H. L. P.; Furtado, L. E. T. A.; de  
574 Castro-Costa, C. M.; Rola, F. H.; Braga, L. L. B. C.; Gondim, F. D. A., Peripheral neuropathy  
575 and neurological disorders in an unselected Brazilian population-based cohort of IBD patients.  
576 *Inflammatory Bowel Diseases* **2008**, *14* (3), 389-395.
- 577 44. Yang, H.; Xiong, X.; Li, T.; Yin, Y., Ethanolamine enhances the proliferation of intestinal  
578 epithelial cells via the mTOR signaling pathway and mitochondrial function. *In Vitro Cell Dev*



579 *Biol Anim* 2016, 52 (5), 562-7.

580 **Table 1. Expression of inflammation-related cytokines driven by different EA levels**

| Cytokines<br>pg/mg·pro | Control                        | LowEA                           | HighEA                          | P-value |
|------------------------|--------------------------------|---------------------------------|---------------------------------|---------|
|                        | 0 $\mu$ M                      | 500 $\mu$ M                     | 3000 $\mu$ M                    |         |
| IL1                    | 202.8 $\pm$ 11.42 <sup>a</sup> | 136.75 $\pm$ 9.048 <sup>b</sup> | 87.903 $\pm$ 6.480 <sup>c</sup> | <0.001  |
| IL6                    | 150.8 $\pm$ 8.595 <sup>a</sup> | 110.9 $\pm$ 11.29 <sup>b</sup>  | 71.59 $\pm$ 4.911 <sup>c</sup>  | <0.001  |
| TNF $\alpha$           | 1185 $\pm$ 33.09 <sup>a</sup>  | 889.4 $\pm$ 72.60 <sup>b</sup>  | 566.2 $\pm$ 30.21 <sup>c</sup>  | <0.001  |
| IL17                   | 53.87 $\pm$ 2.941 <sup>a</sup> | 48.30 $\pm$ 2.184 <sup>a</sup>  | 40.78 $\pm$ 2.533 <sup>b</sup>  | 0.003   |
| INF $\gamma$           | 115.1 $\pm$ 6.708 <sup>a</sup> | 85.15 $\pm$ 6.030 <sup>b</sup>  | 40.22 $\pm$ 3.054 <sup>c</sup>  | <0.001  |
| sIgA                   | 36.11 $\pm$ 2.209 <sup>b</sup> | 39.06 $\pm$ 2.605 <sup>ab</sup> | 45.18 $\pm$ 1.935 <sup>a</sup>  | 0.022   |
| IL10                   | 575.4 $\pm$ 15.93              | 635.0 $\pm$ 37.34               | 602.0 $\pm$ 30.64               | 0.364   |
| IL22                   | 54.23 $\pm$ 1.963              | 52.88 $\pm$ 2.895               | 52.66 $\pm$ 3.367               | 0.913   |

581 **a,b** Values within a row with different superscript letters differ significantly at  $p < 0.05$ .

582

583 **Figure 1. Ethanolamine treatments altered the colonic morphology of DSS-treated mice. A.**  
584 DSS (3%) in drinking water was exploited in generating intestinal inflammation, and then  
585 different levels of ethanolamine were supplied in the same way. **B.** Ethanolamine treatment  
586 reduced the bodyweight of mice with colitis. **C-D.** Ethanolamine treatment did not affect average  
587 daily food and water intake. **E.** Both proximal and distal colon morphology of mice were  
588 investigated. **F-H.** Ethanolamine significantly reduced the crypt depth and crypt/villus ratio of the  
589 proximal colon. **I-K.** Ethanolamine increased the villus height and villus/crypt ratio of the distal  
590 colon.

591

592 **Figure 2. Impacts of EA treatments on the colonic microbiome. A-B.** Shannon and Simpson  
593 indicators for microbial diversity. **C-D.** Chao1 and ACE indicators for microbial abundance. **E.**  
594 The metric PD\_whole\_tree for phylogenetic diversity. **F.** Observed species in the microbiome.  
595 **G.** Top-ten most abundant phylum and genus of microbiota in both the control group and EA  
596 treated groups. **H-I.** Significantly altered bacteria driven by different EA levels. The heat tree  
597 analysis was applied to leverage the hierarchical structure of taxonomic classifications to  
598 quantitatively (using the median abundance) and statistically (using the non-parametric Wilcoxon  
599 Rank Sum test) depict taxonomic differences between microbial communities.

600

601 **Figure 3. Microbial differences driven by different EA levels in the colon of DSS-treated**  
602 **mice. A.** Genus composition of both the control group and EA treated groups. **B.** Lefse analysis of  
603 whole OTU in all groups (LDA score=2.0). **C.** Differences in microbial composition between  
604 control and EA treated groups at the genus level.

605

606 **Figure 4. Metabolic functions of colonic microbiota driven by different EA levels in the**  
607 **DSS-treated mice model. A.** PCA analysis of predicted KEGG pathways. **B.** Top-10 most  
608 abundant pathways at KEGG level-2. **C.** Composition of metabolic pathways of colonic microbiota  
609 at KEGG level-3. **D.** Differences in metabolic functions between control and EA treated groups at  
610 the KEGG level-3. Moreover, no statistically significant differences existed between the control

611 group and high EA treatment

612

613 **Figure 5. EA treatments altered the colonic morphology of DSS-treated mice.** **A.** DSS(3%) in  
614 drinking water was exploited in generating intestinal inflammation, and then different levels of EA  
615 were supplied in the same way. **B.** EA treatment reduced the bodyweight of mice with  
616 colitis. **C-D.** EA treatment did not affect average daily food and water intake. **E.** Both proximal and  
617 distal colon morphology of mice were investigated. **F-H.** EA significantly reduced the crypt depth  
618 and crypt/villus ratio of the proximal colon. **I-K.** EA increased the villus height and villus/crypt  
619 ratio of the distal colon.

620

621 **Figure 6. Impacts of EA on mucosal permeability and antimicrobial protein mRNA**  
622 **expression.** **A -D.** Protein and mRNA expression of occludin. **E-H,** mRNA expression of Reg3 $\beta$ ,  
623 BD1, BD2 and MUC2.

624

625 **Figure 7. Impacts of EA on serum indicators and mRNA expression of cytokine-related**  
626 **genes.** **A -D.** Impacts of EA on serum ALT, AST, TBA, and DAO. **E-L.** Relative mRNA expression  
627 of IL1 $\beta$ , IL6, IL10, IL22, IL17A, sIgA, TNF $\alpha$  and INF $\gamma$  genes.

628

629 **Figure 8. Impacts of EA on protein and mRNA expression of TLR4 and MyD88.**

630

631 **Figure 9. Impacts of EA on TLR-4 and Occludin expression on DSS-treat colonic organoids.**  
632 **A-B.** Establishing of DSS(3%) treated the colonic organoid model **C-D.** Impacts of EA treatments  
633 on the surface area and budding efficiency of colonic organoids. **E-F.** Organoid numbers per well  
634 and DSS disrupted organoid ratio. **G-H.** TLR4 protein expression in DSS-treated organoids driven  
635 by different EA levels. **I-J.** Relative mRNA expression of TLR4 and MyD88 genes. **K.** Occludin  
636 mRNA expression. **L.** Occludin imaging of the control group and 500 $\mu$ M group. **M.** Relative  
637 mRNA expression of antimicrobial proteins, only Reg3 $\beta$  significantly increased in 500 $\mu$ M group.

638

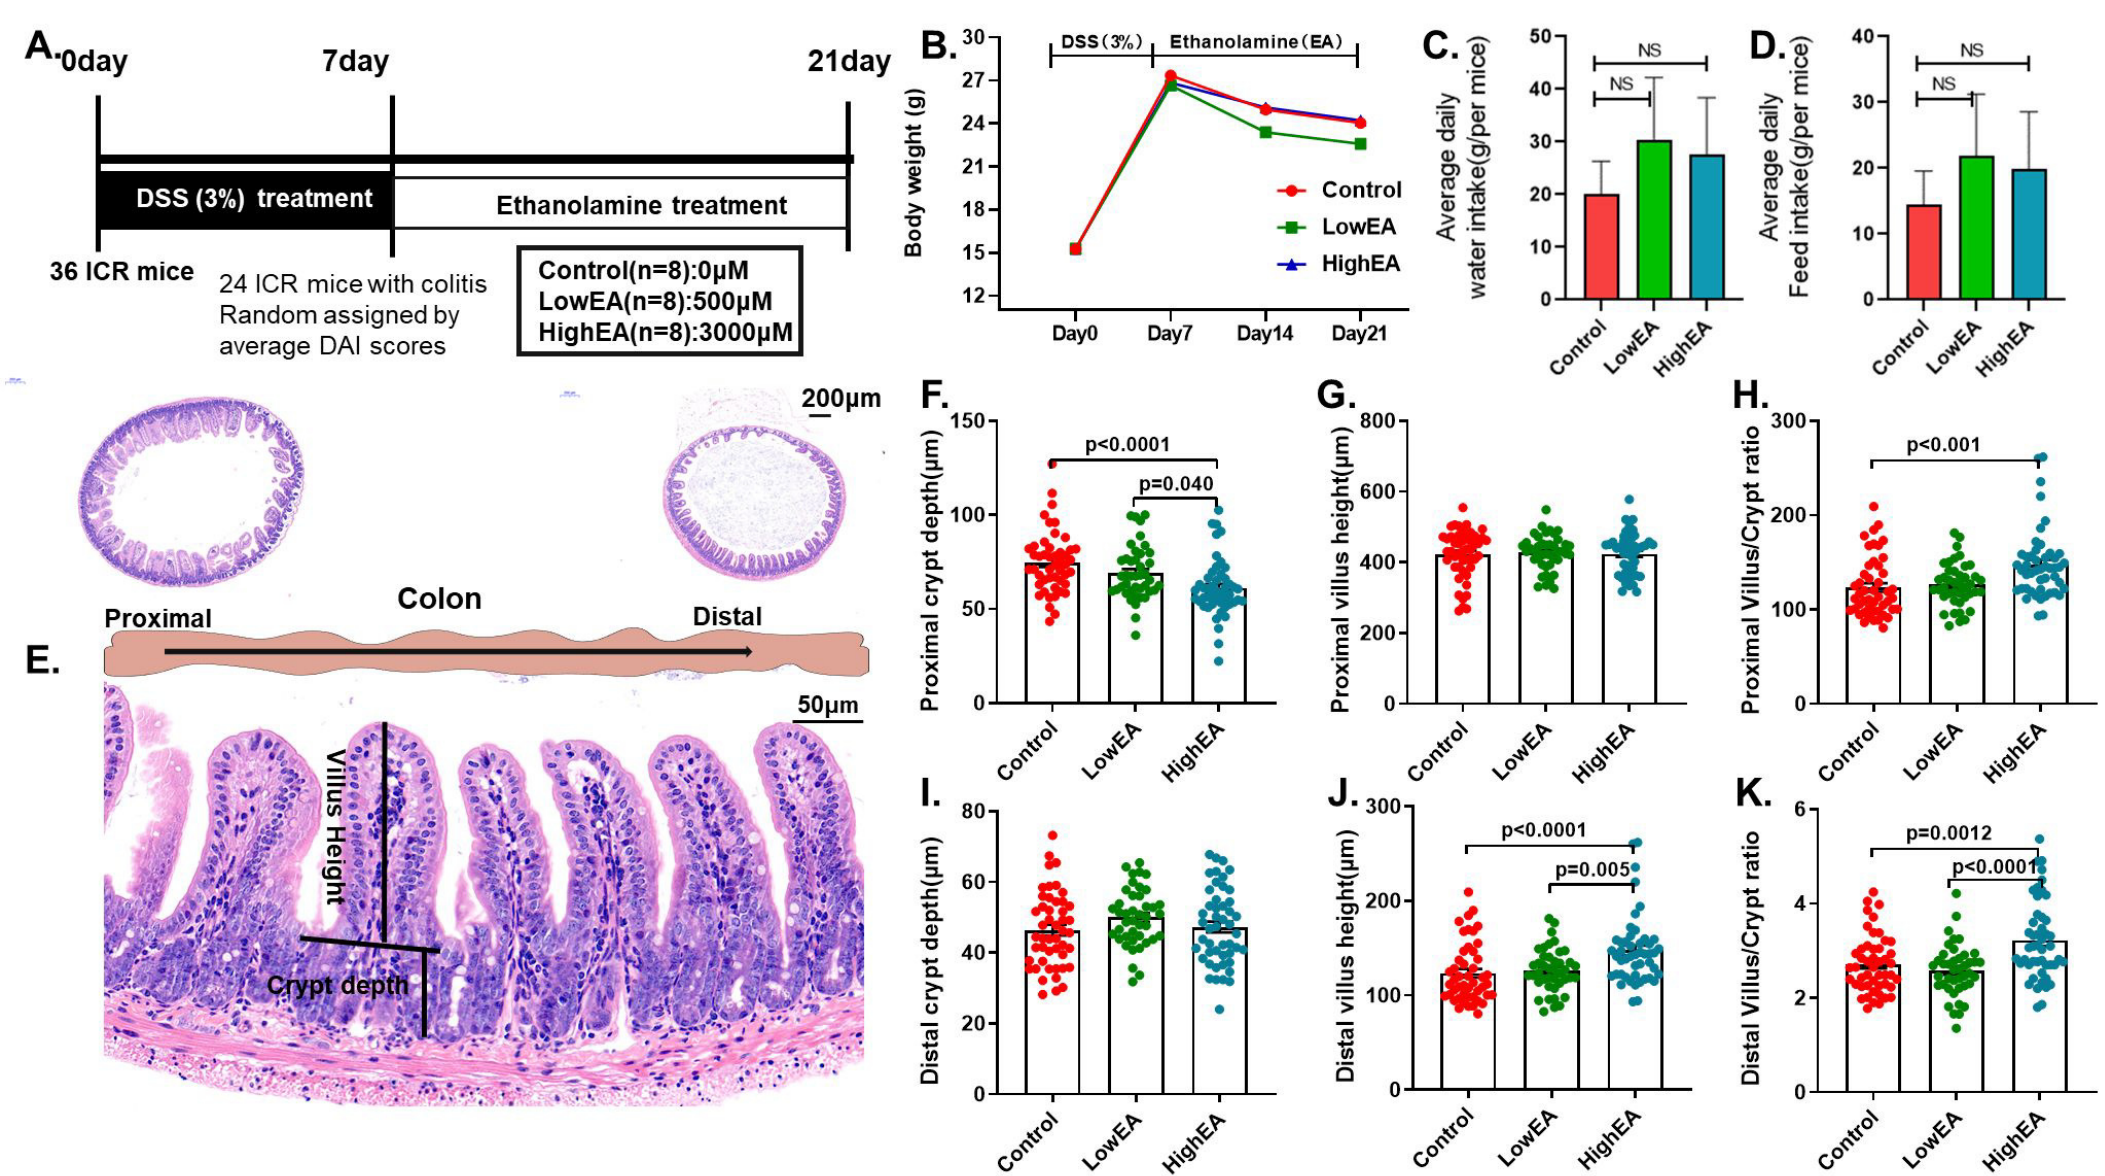

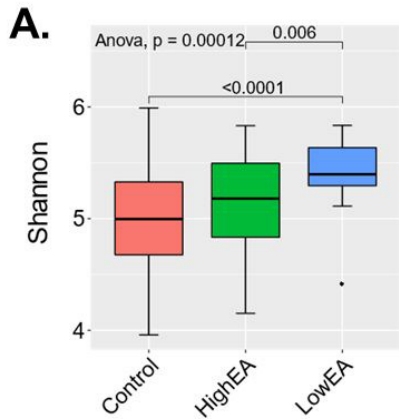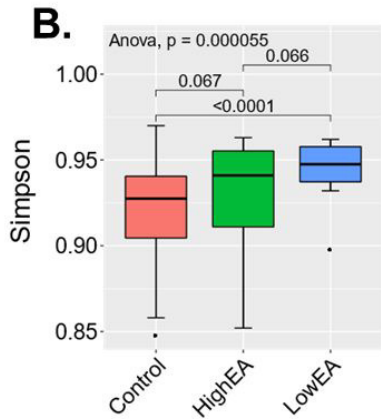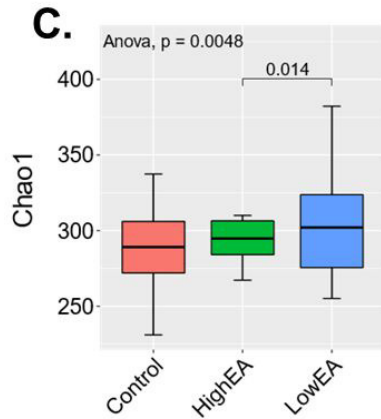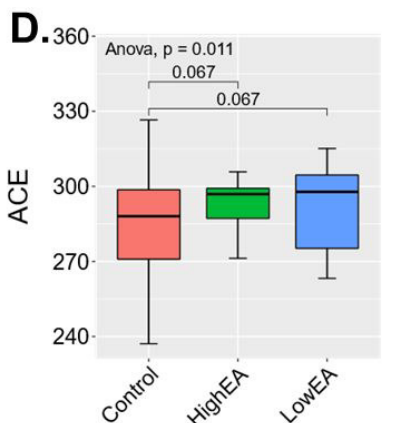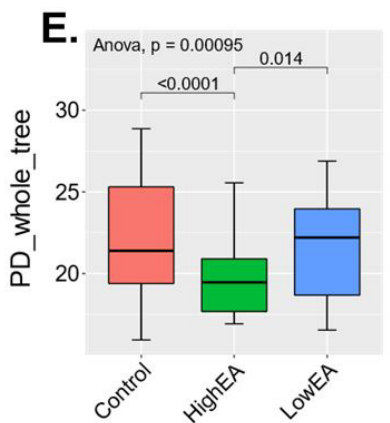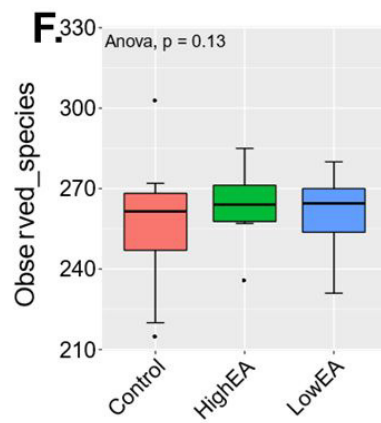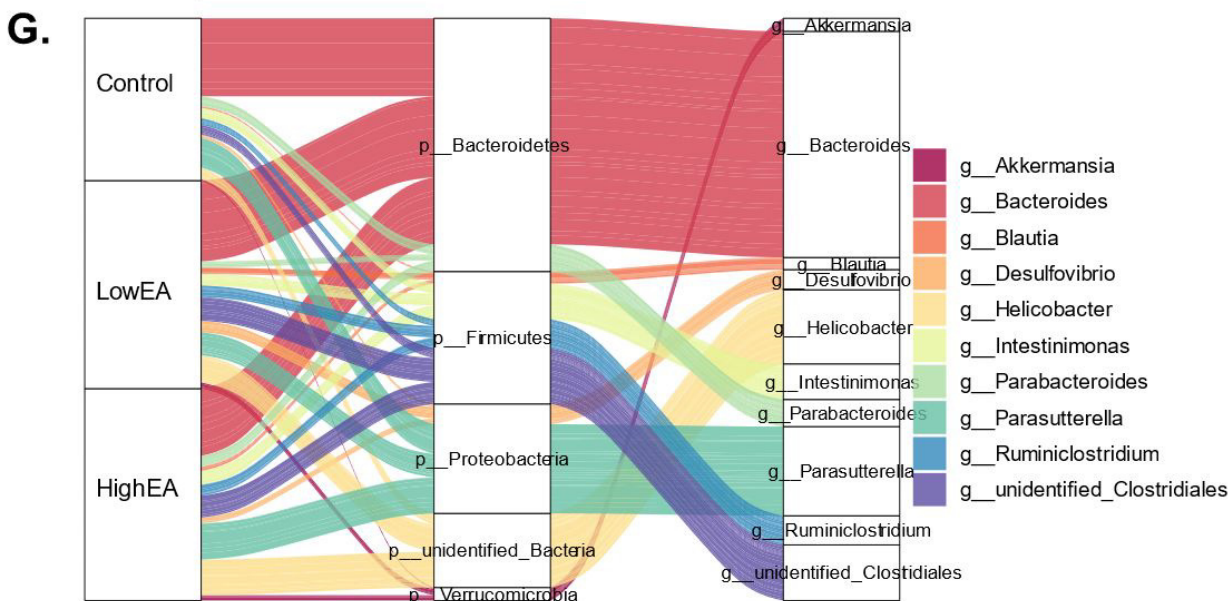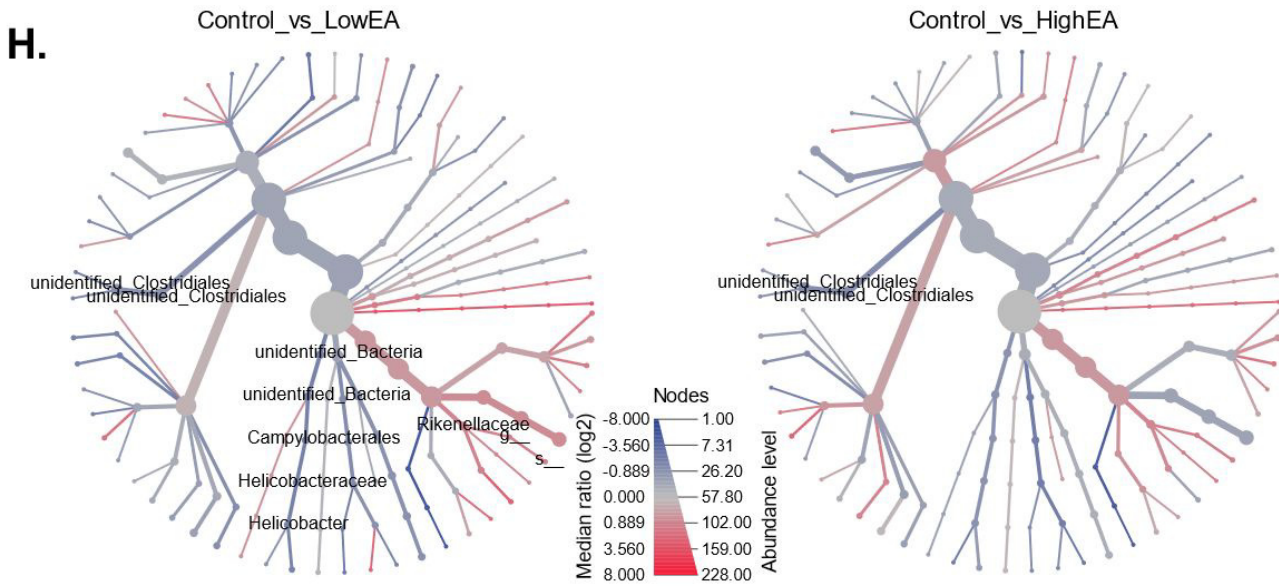

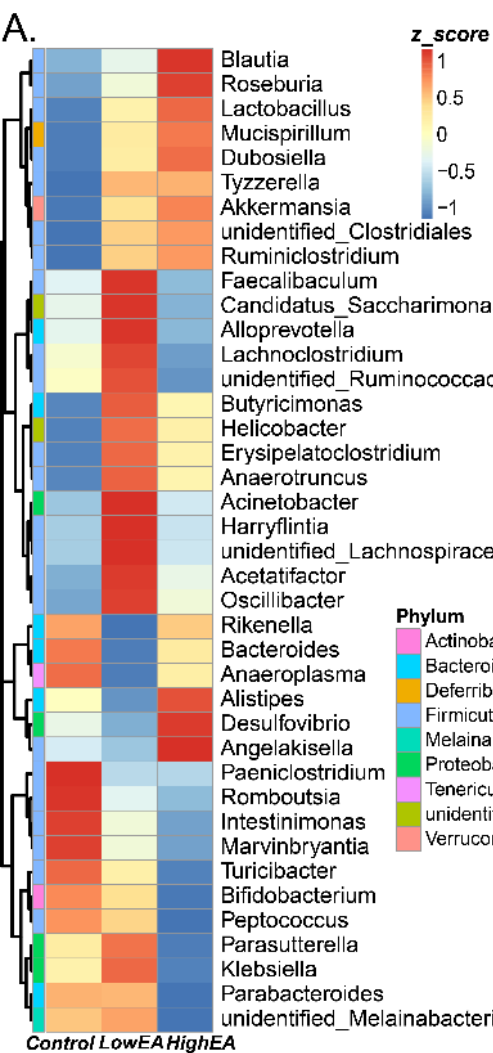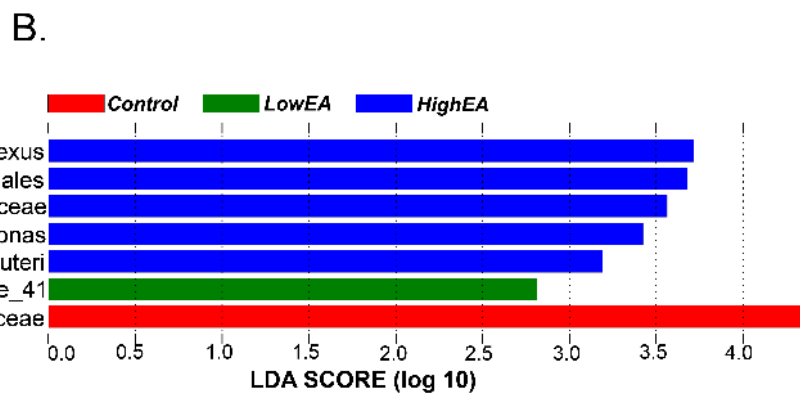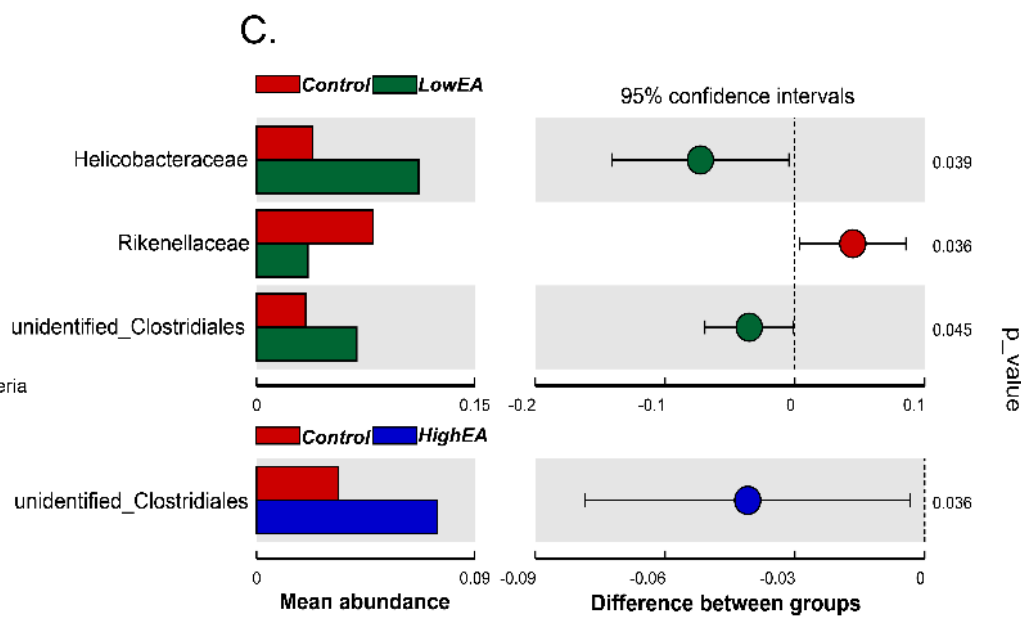

**A.**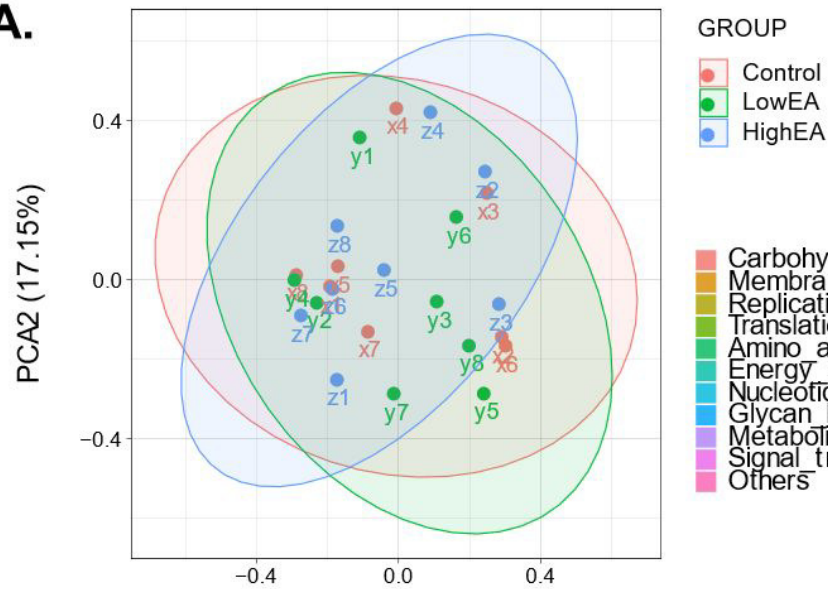**B.**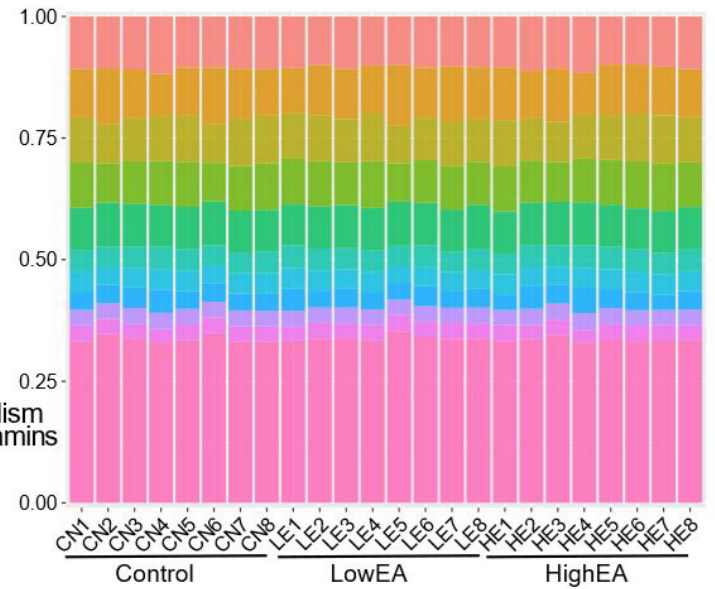**C.**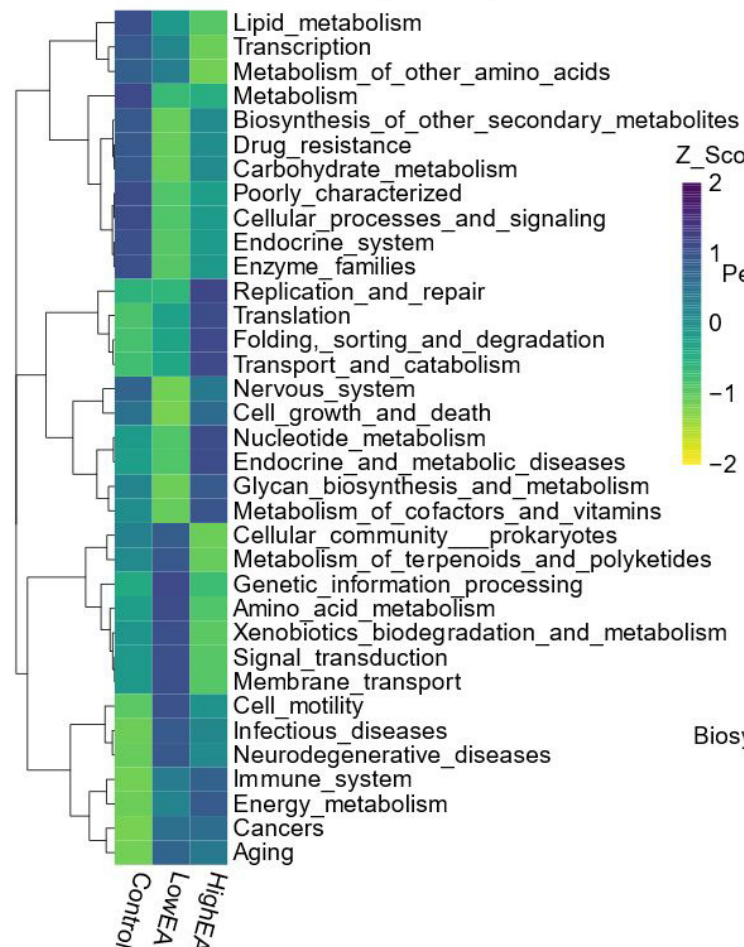**D.**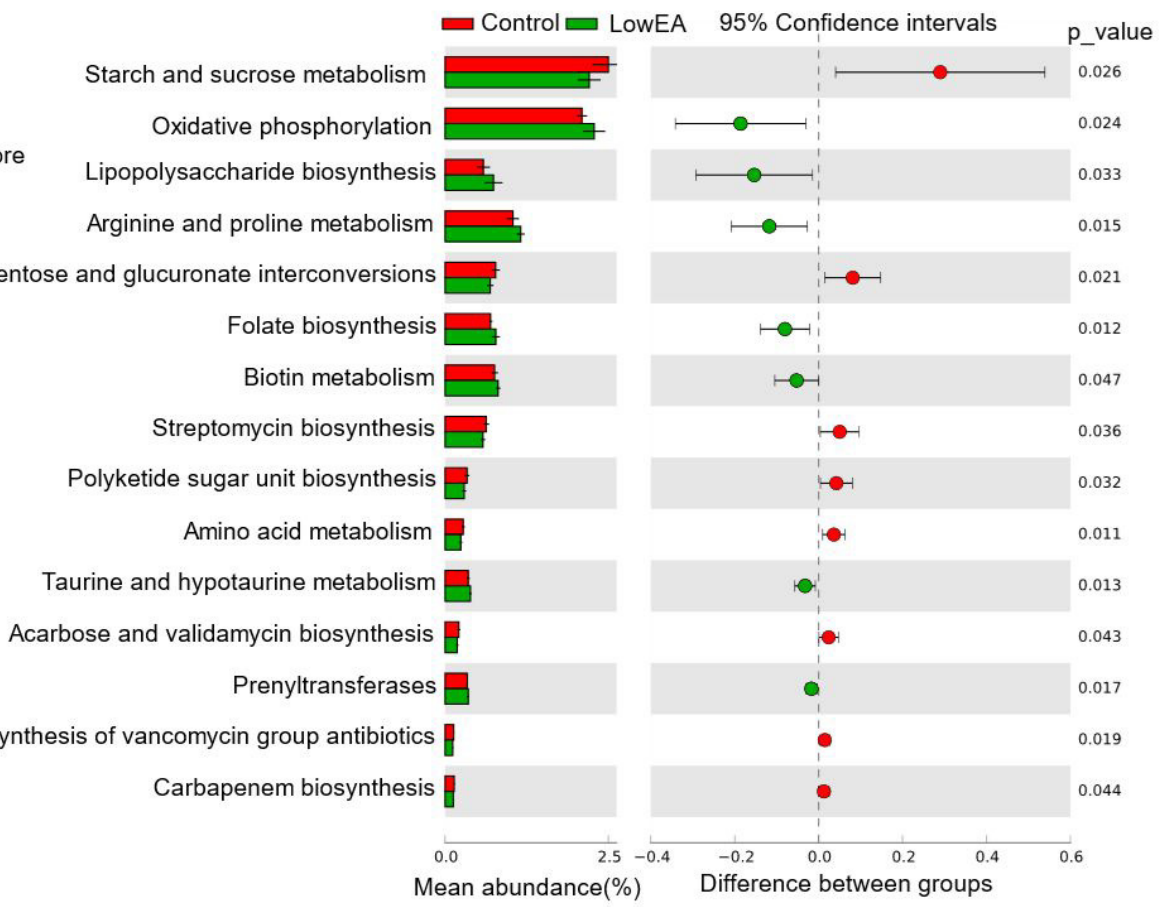

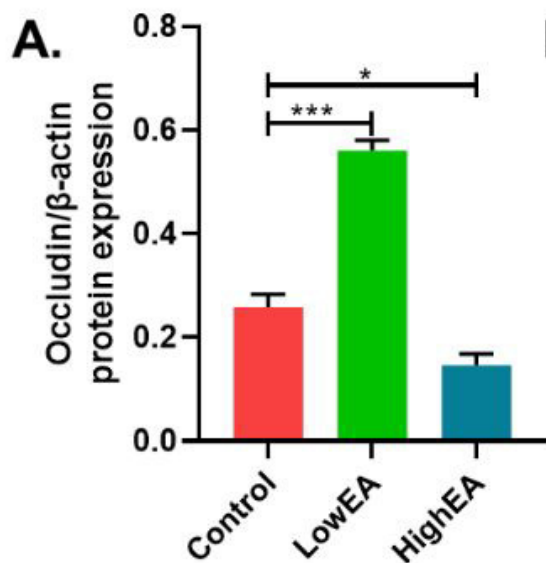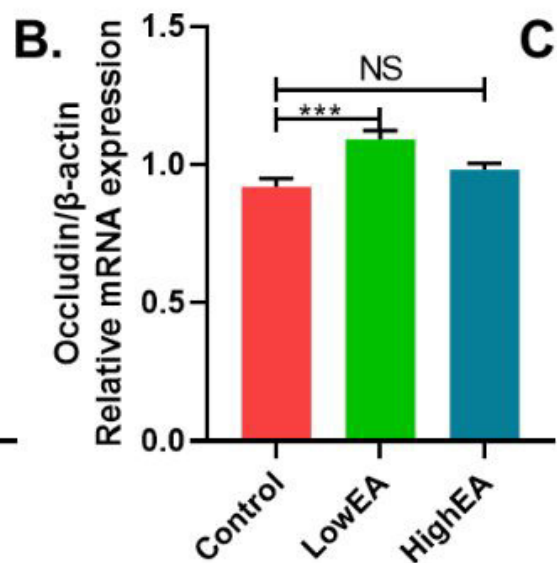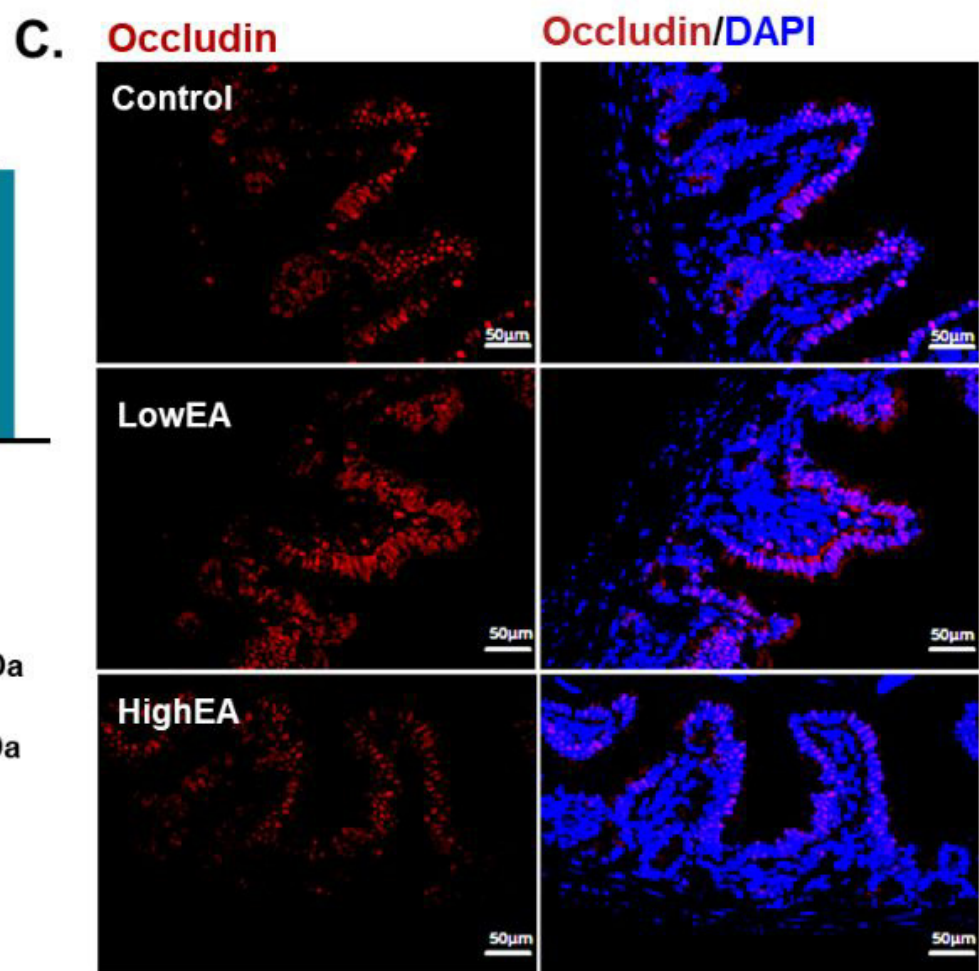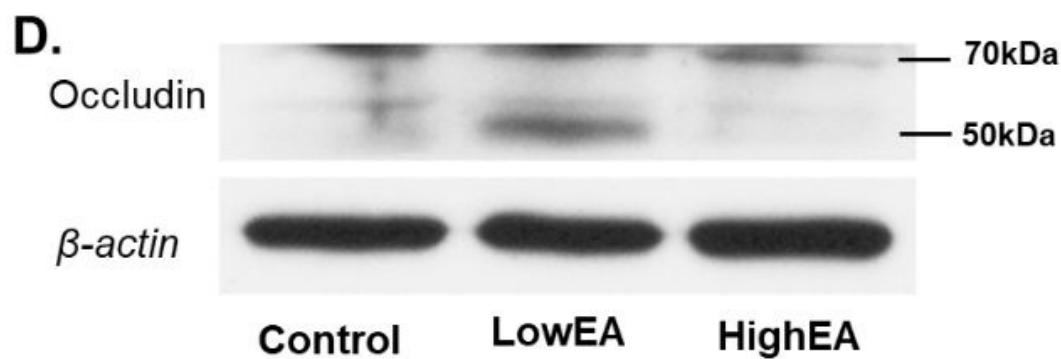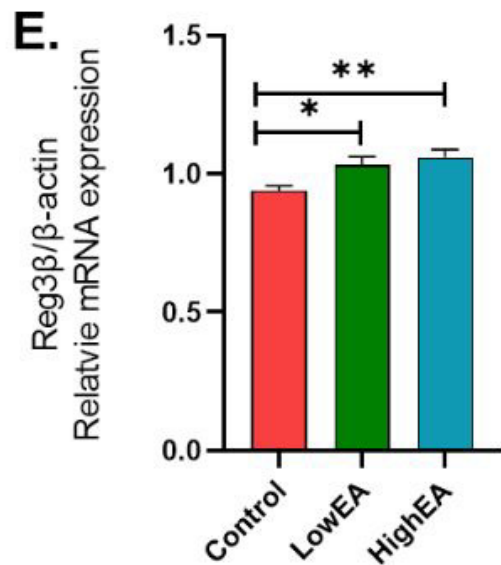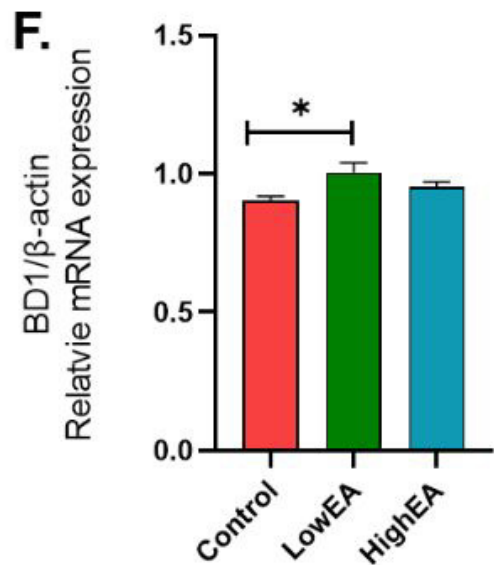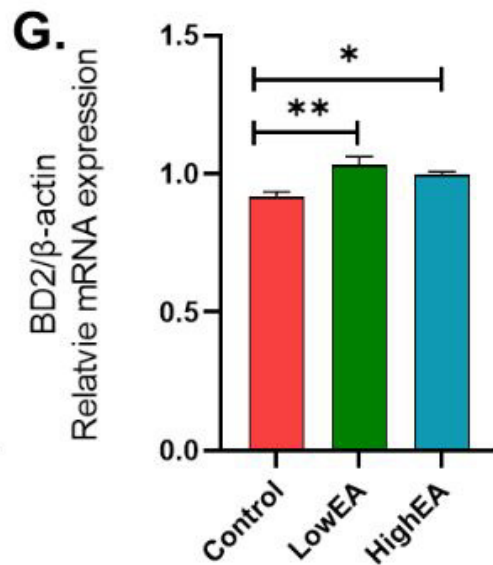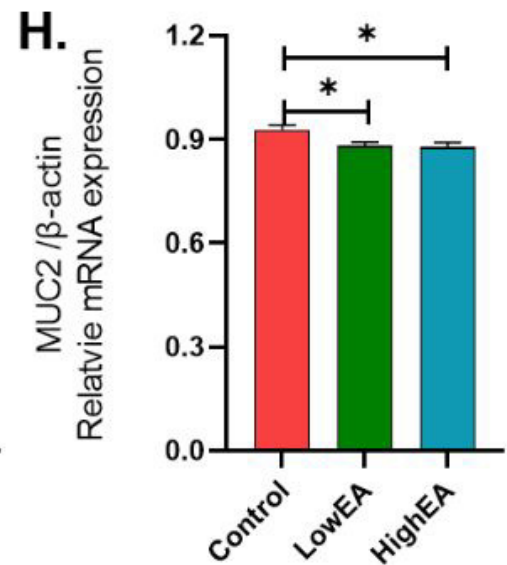

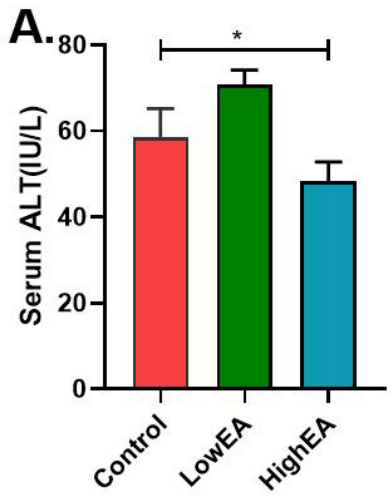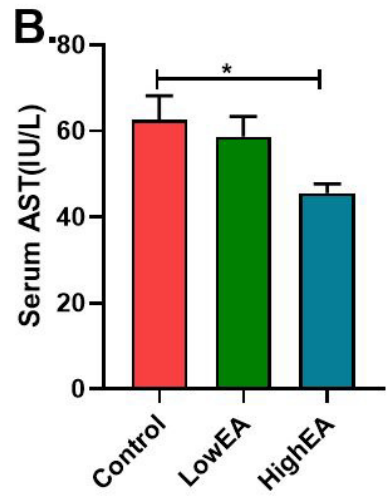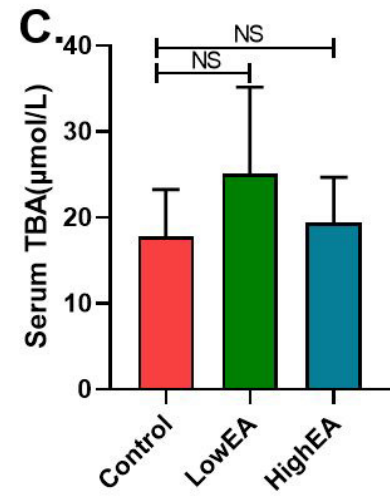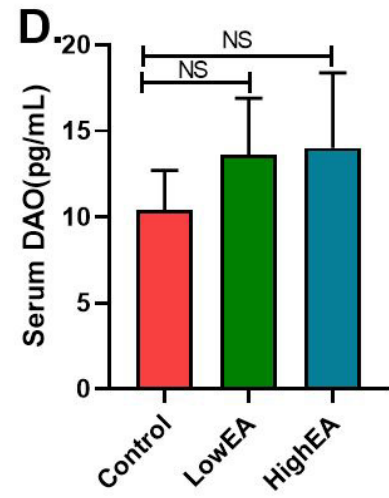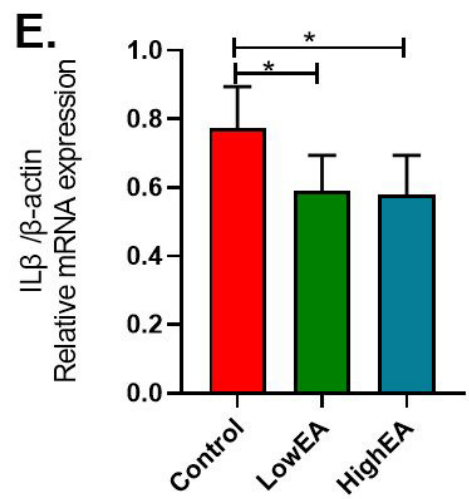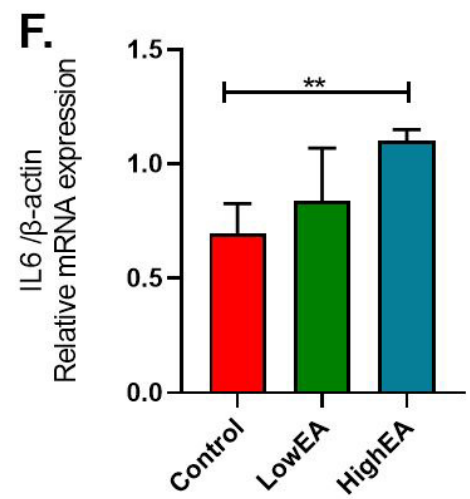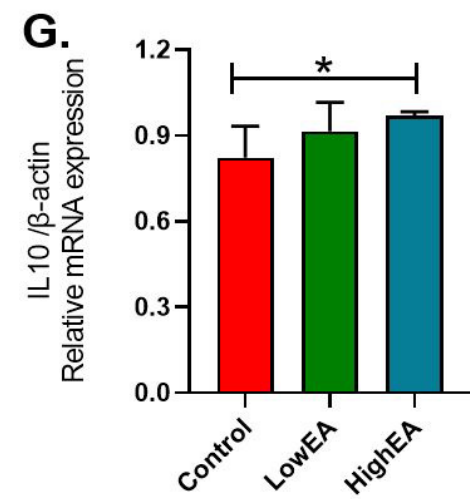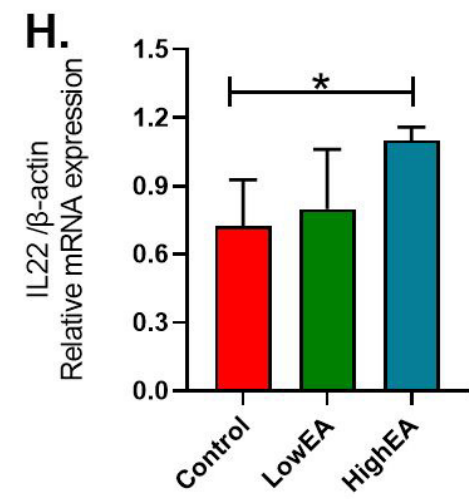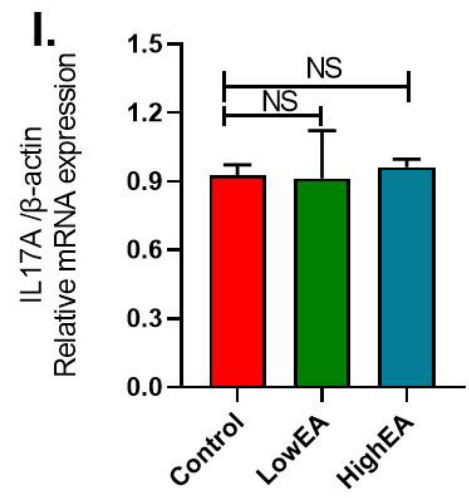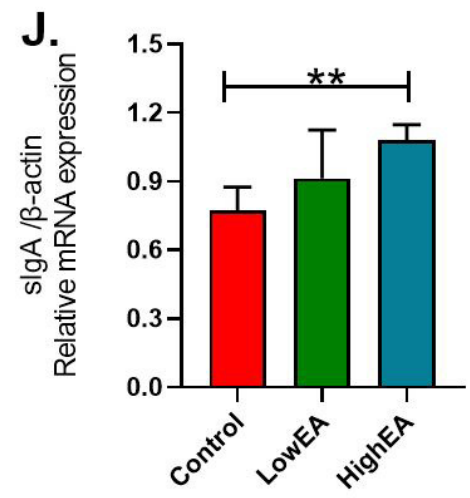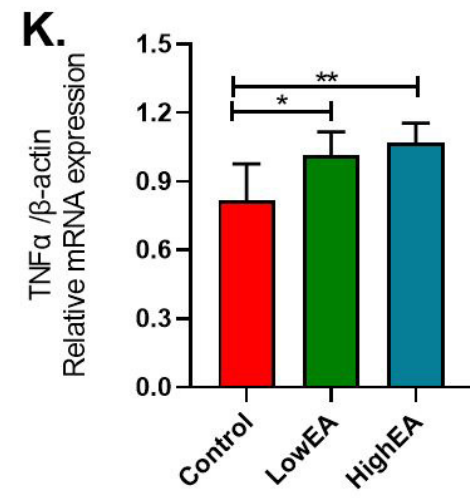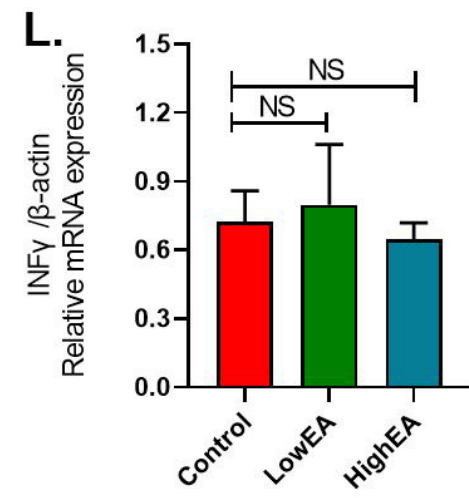



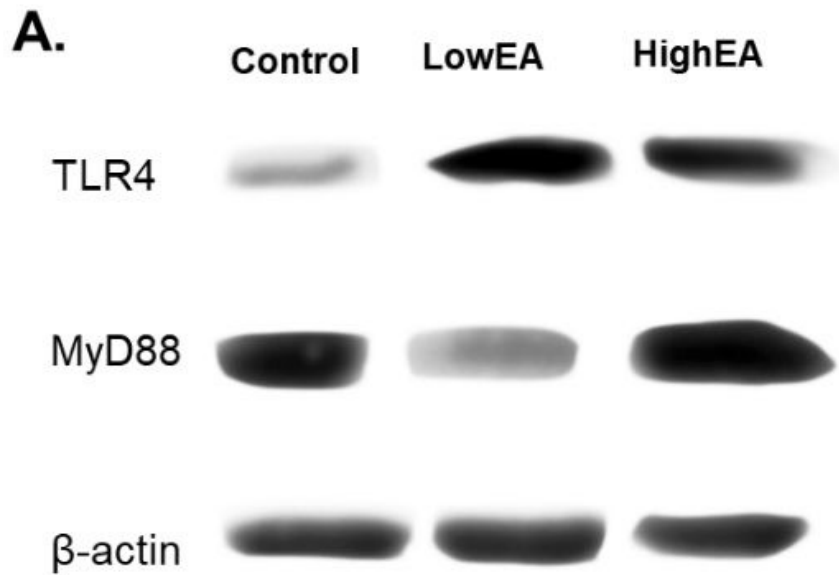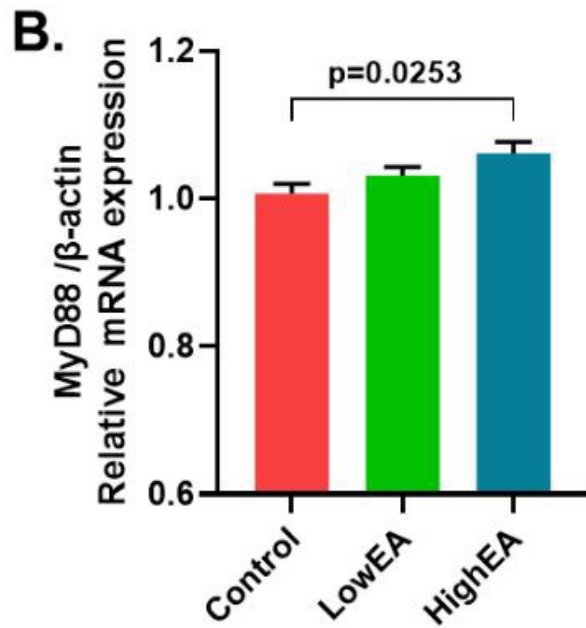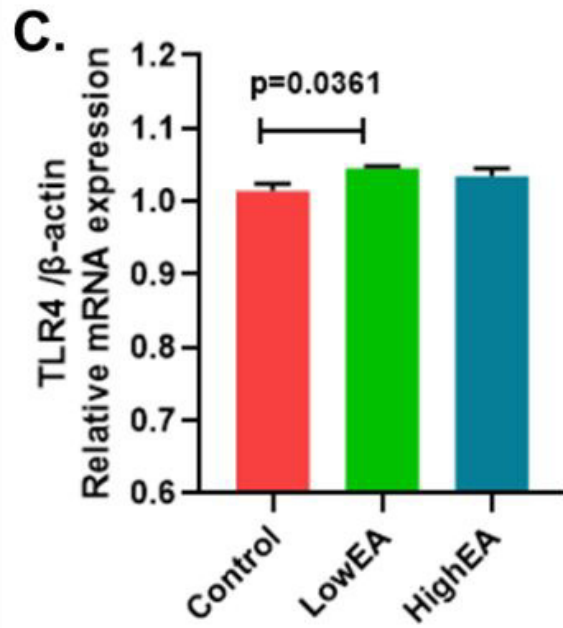

**A.**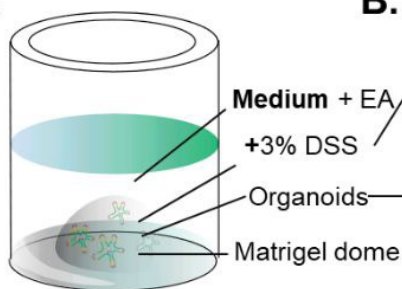**B.**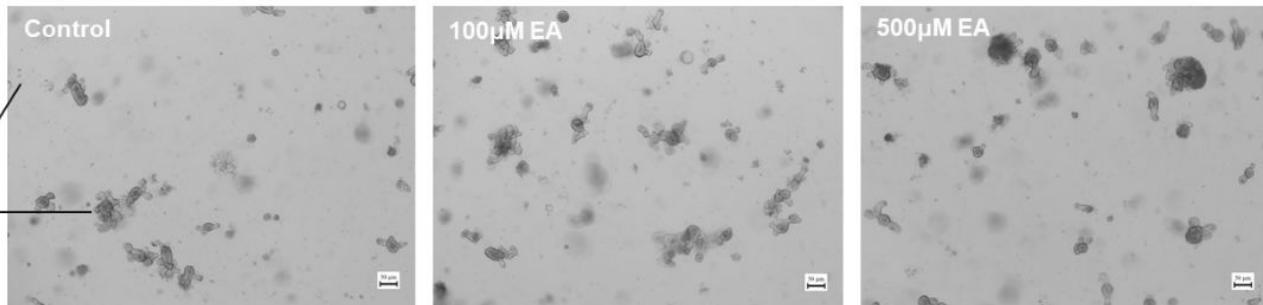**C.**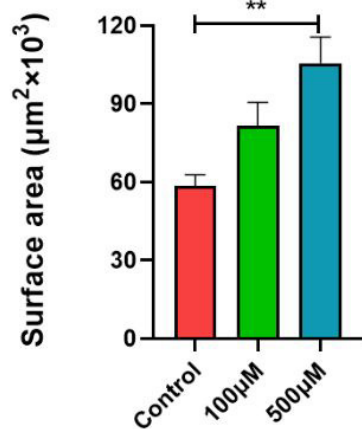**D.**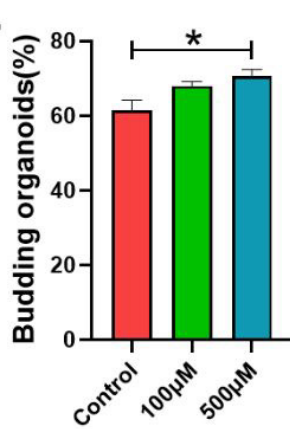**E.**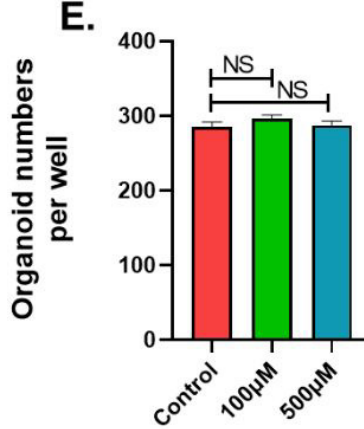**F.**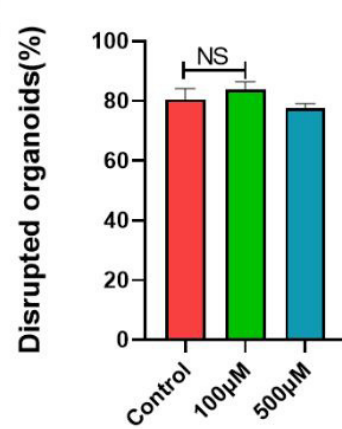**G.**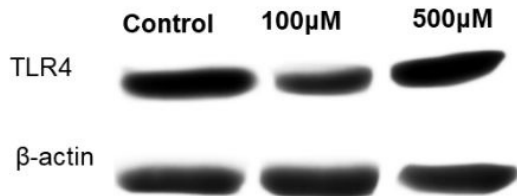**H.**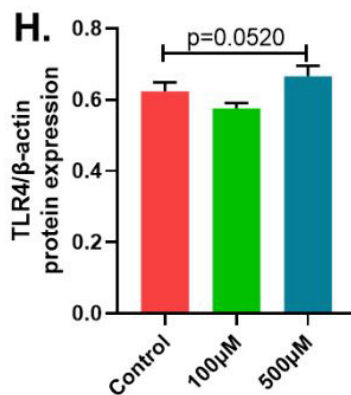**I.**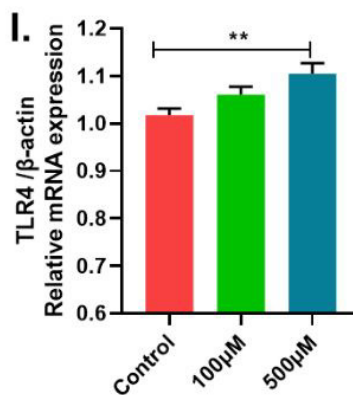**J.**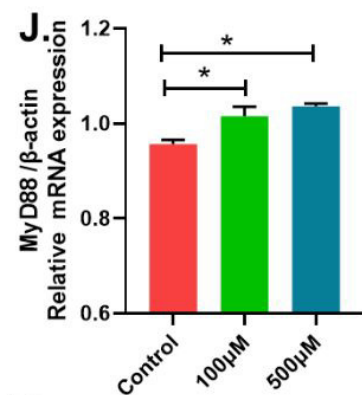**K.**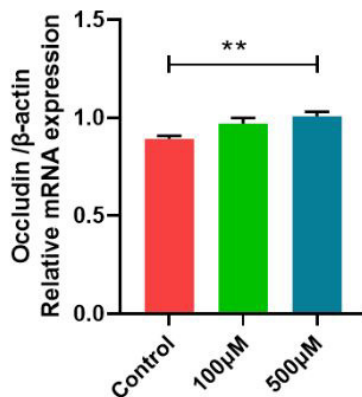**L.**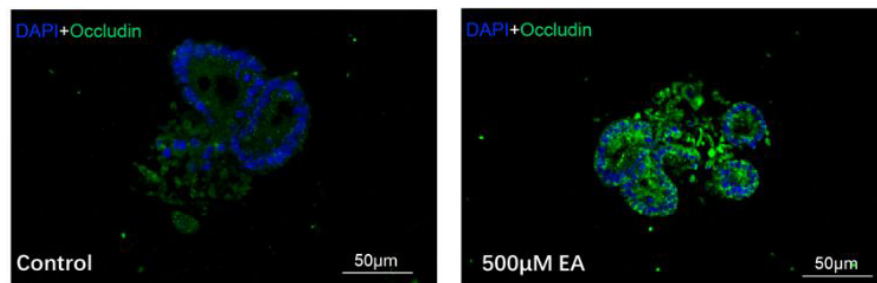**M.**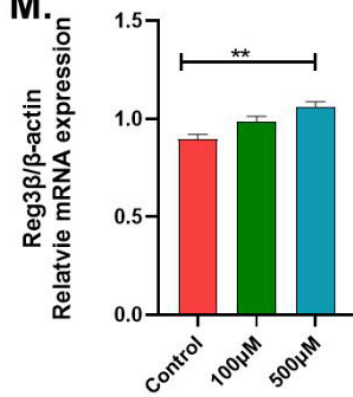

Source: https://biorxiv.org/content/10.1101/2020.07.09.196592v1.full.pdf
